# Supplementary material for: Identification of Potentially Novel Molecular Targets of Endometrial Cancer Using a Non-Biased Proteomic Approach
Source: MDPI journal article supplement (doi:10.3390/cancers15184665), 2023-09-21
Supplement: s1 [file s1]

**A.H. Taylor, J.C. Konje and T. Ayakannu – “Identification of Potentially Novel Molecular Targets of Endometrial Cancer Using a Non-Biased Proteomic Approach”**

**Supplemental Table S2. Proteins identified as already being associated with endometrial cancer.**

| Reactome® Network                      | Proteins identified in network                                                                                                                                                                                                                          | PubMed id                                                                                                                                                                                                                                                                                                                                                                                                                                                                                                                                                                                                                                                                                                                                                                                                                                                                                                                                                                      |
|----------------------------------------|---------------------------------------------------------------------------------------------------------------------------------------------------------------------------------------------------------------------------------------------------------|--------------------------------------------------------------------------------------------------------------------------------------------------------------------------------------------------------------------------------------------------------------------------------------------------------------------------------------------------------------------------------------------------------------------------------------------------------------------------------------------------------------------------------------------------------------------------------------------------------------------------------------------------------------------------------------------------------------------------------------------------------------------------------------------------------------------------------------------------------------------------------------------------------------------------------------------------------------------------------|
| Autophagy                              | TUBAL3                                                                                                                                                                                                                                                  | <a href="#">30857319</a>                                                                                                                                                                                                                                                                                                                                                                                                                                                                                                                                                                                                                                                                                                                                                                                                                                                                                                                                                       |
| Cell cycle                             | AKAP9; ATRX; CDH1; CDKN1B; DAXX; ITGB3; NUP62; POLE3; RAD50; RANBP2; SMARCA5; SYNE1; SYNE2; TP53BP1; TUBAL3                                                                                                                                             | <a href="#">28448305</a> ; <a href="#">31157162</a> ; <a href="#">25286960</a> ; <a href="#">21454826</a> ; <a href="#">31384126</a> ; <a href="#">26384307</a> ; <a href="#">27092881</a> ; <a href="#">25224212</a> ; <a href="#">27979878</a> ; <a href="#">30684972</a> ; <a href="#">33633465</a> ; <a href="#">26330482</a> ; <a href="#">31787999</a> ; <a href="#">32059776</a> ; <a href="#">30857319</a>                                                                                                                                                                                                                                                                                                                                                                                                                                                                                                                                                             |
| Cell-cell communication                | CADM1; CDH1; CTNNB1; CTNND1; DST; F11R; ITGB4; JUP; PSAP                                                                                                                                                                                                | <a href="#">29185275</a> ; <a href="#">25286960</a> ; <a href="#">26645990</a> ; <a href="#">23874806</a> ; <a href="#">30935077</a> ; <a href="#">30675285</a> ; <a href="#">30846786</a> ; <a href="#">23874806</a> ; <a href="#">23874806</a>                                                                                                                                                                                                                                                                                                                                                                                                                                                                                                                                                                                                                                                                                                                               |
| Cellular responses to external stimuli | CDH1; CDKN1B; HIST1H1A; HIST1H1D; HMGA1; HSPH1; MT2A; NUP62; PSMC2; RAD50; RANBP2; RPL10; RPL13A; RPL27A; RPL28; RPL29; RPLP1; RPS24; STAT3; TUBAL3                                                                                                     | <a href="#">25286960</a> ; <a href="#">21454826</a> ; <a href="#">33177874</a> ; <a href="#">33177874</a> ; <a href="#">27001612</a> ; <a href="#">32652986</a> ; <a href="#">26485755</a> ; <a href="#">27092881</a> ; <a href="#">29130934</a> ; <a href="#">27979878</a> ; <a href="#">30684972</a> ; <a href="#">21226949</a> ; <a href="#">32807831</a> ; <a href="#">20015385</a> ; <a href="#">30888986</a> ; <a href="#">26892688</a> ; <a href="#">32547595</a> ; <a href="#">19101990</a> ; <a href="#">28114390</a> ; <a href="#">30857319</a>                                                                                                                                                                                                                                                                                                                                                                                                                      |
| Chromatin organisation                 | ACTL6A; CARM1; CHD3; CHD4; HDAC2; KMT2D; SMAP; SMARCC2; TAF15                                                                                                                                                                                           | <a href="#">31028182</a> ; <a href="#">22876322</a> ; <a href="#">29888111</a> ; <a href="#">29888111</a> ; <a href="#">22112317</a> ; <a href="#">31864301</a> ; <a href="#">30104481</a> ; <a href="#">31028182</a> ; <a href="#">25733820</a>                                                                                                                                                                                                                                                                                                                                                                                                                                                                                                                                                                                                                                                                                                                               |
| Circadian clock                        | CARM1                                                                                                                                                                                                                                                   | <a href="#">22876322</a>                                                                                                                                                                                                                                                                                                                                                                                                                                                                                                                                                                                                                                                                                                                                                                                                                                                                                                                                                       |
| Developmental Biology                  | ADAM10; ALCAM; CARM1; COL2A1; COL3A1; COL4A2; COL5A1; CTNNA2; CTNNB1; DEK; DSG2; HDAC2; ITGA2; ITGB3; JUP; KMT2D; LAMA1; MMP9; MYH14; PABPC1; PML; PRKAR2A; PRNP; PSMC2; PTPRC; RNPS1; RPL10; RPL13A; RPL27A; RPL28; RPL29; RPLP1; RPS24; STAT3; TUBAL3 | <a href="#">25781554</a> ; <a href="#">29682175</a> ; <a href="#">22876322</a> ; <a href="#">31268882</a> ; <a href="#">19065659</a> ; <a href="#">26849234</a> ; <a href="#">32641130</a> ; <a href="#">27409342</a> ; <a href="#">26645990</a> ; <a href="#">25733820</a> ; <a href="#">30846786</a> ; <a href="#">22112317</a> ; <a href="#">25733820</a> ; <a href="#">26384307</a> ; <a href="#">23874806</a> ; <a href="#">31864301</a> ; <a href="#">24832084</a> ; <a href="#">28114390</a> ; <a href="#">33217970</a> ; <a href="#">31607220</a> ; <a href="#">28969912</a> ; <a href="#">31850214</a> ; <a href="#">32560489</a> ; <a href="#">29130934</a> ; <a href="#">25733820</a> ; <a href="#">31355251</a> ; <a href="#">21226949</a> ; <a href="#">32807831</a> ; <a href="#">20015385</a> ; <a href="#">30888986</a> ; <a href="#">26892688</a> ; <a href="#">32547595</a> ; <a href="#">19101990</a> ; <a href="#">28114390</a> ; <a href="#">30857319</a> |
| Digestion and absorption               | There are no proteins to report in this category.                                                                                                                                                                                                       | There are no proteins to report in this category.                                                                                                                                                                                                                                                                                                                                                                                                                                                                                                                                                                                                                                                                                                                                                                                                                                                                                                                              |
| Disease                                | ABI1; ADAM10; AHCYL1; AKAP9; ATRX; B4GALT1; BRD4; CD14; CDH1; CDKN1B; CHD3; CHD4; CTNNB1; CTNND1; CYFIP2; DAXX; DNAJC3; ESR1; GBE1; GFPT1; GLB1; HDAC2; HLA-A; HMGA1;                                                                                   | <a href="#">25733820</a> ; <a href="#">25781554</a> ; <a href="#">26865667</a> ; <a href="#">28448305</a> ; <a href="#">31157162</a> ; <a href="#">31807118</a> ; <a href="#">29941483</a> ; <a href="#">25880896</a> ; <a href="#">25286960</a> ; <a href="#">21454826</a> ; <a href="#">29888111</a> ; <a href="#">29888111</a> ; <a href="#">26645990</a> ; <a href="#">23874806</a> ; <a href="#">30935077</a> ; <a href="#">31384126</a> ; <a href="#">31853186</a> ; <a href="#">23593326</a> ; <a href="#">33424936</a> ; <a href="#">29464034</a> ; <a href="#">32894095</a> ; <a href="#">22112317</a> ; <a href="#">28358435</a> ; <a href="#">27001612</a>                                                                                                                                                                                                                                                                                                          |

|                                         |                                                                                                                                                                                                                                           |                                                                                                                                                                                                                                                                                                                                                                                                                                                                                                                                                                                                                                                                                                                                                                                                                                                                    |
|-----------------------------------------|-------------------------------------------------------------------------------------------------------------------------------------------------------------------------------------------------------------------------------------------|--------------------------------------------------------------------------------------------------------------------------------------------------------------------------------------------------------------------------------------------------------------------------------------------------------------------------------------------------------------------------------------------------------------------------------------------------------------------------------------------------------------------------------------------------------------------------------------------------------------------------------------------------------------------------------------------------------------------------------------------------------------------------------------------------------------------------------------------------------------------|
|                                         | IARS2; ITGB3; MAOA;<br>MCCC2; MUC16; NUP62;<br>PAPSS1; PARP1; PML;<br>PRKAR1A; PRKAR2A; PSAP;<br>PSMC2; RANBP2; RPIA;<br>RPL10; RPL13A; RPL27A;<br>RPL28; RPL29; RPLP1;<br>RPS24; SLC16A1; SLC2A1;<br>STAT3; TAF15; TCEA1;<br>TUBAL3      | <a href="#">25733820</a> ; <a href="#">26384307</a> ; <a href="#">25733820</a> ;<br><a href="#">27391266</a> ; <a href="#">31864301</a> ; <a href="#">27092881</a> ;<br><a href="#">22380844</a> ; <a href="#">23762867</a> ; <a href="#">28969912</a> ;<br><a href="#">22461635</a> ; <a href="#">31850214</a> ; <a href="#">23874806</a> ;<br><a href="#">29130934</a> ; <a href="#">30684972</a> ; <a href="#">30177747</a> ;<br><a href="#">21226949</a> ; <a href="#">32807831</a> ; <a href="#">20015385</a> ;<br><a href="#">30888986</a> ; <a href="#">26892688</a> ; <a href="#">32547595</a> ;<br><a href="#">19101990</a> ; <a href="#">29665298</a> ; <a href="#">31720081</a> ;<br><a href="#">28114390</a> ; <a href="#">25733820</a> ; <a href="#">32877461</a> ;<br><a href="#">30857319</a>                                                       |
| DNA repair                              | ACTL6A; PARP1; PGM3;<br>POLE3; RAD23B; RAD50;<br>SMARCA5; SMARCC2; SUMO2;<br>SUMO3; TCEA1; TP53BP1;<br>TRIM25; XPC                                                                                                                        | <a href="#">31028182</a> ; <a href="#">23762867</a> ; <a href="#">508567</a> ;<br><a href="#">25224212</a> ; <a href="#">22544315</a> ; <a href="#">27979878</a> ;<br><a href="#">33633465</a> ; <a href="#">31028182</a> ; <a href="#">25733820</a> ;<br><a href="#">25733820</a> ; <a href="#">32877461</a> ; <a href="#">32059776</a> ;<br><a href="#">30586414</a> ; <a href="#">21750170</a>                                                                                                                                                                                                                                                                                                                                                                                                                                                                  |
| DNA replication                         | CDH1; ITGB3; MCM2;<br>POLE3; PSMC2                                                                                                                                                                                                        | <a href="#">25286960</a> ; <a href="#">26384307</a> ; <a href="#">31268882</a> ;<br><a href="#">25224212</a> ; <a href="#">29130934</a>                                                                                                                                                                                                                                                                                                                                                                                                                                                                                                                                                                                                                                                                                                                            |
| Extracellular<br>matrix<br>organisation | ADAM10; CDH1; COL16A1;<br>COL26A1; COL2A1; COL3A1;<br>COL4A2; COL5A1; DST;<br>F11R; FBN2; ITGA2;<br>ITGAM; ITGB3; ITGB4;<br>LAMA1; LTBP1; MME;<br>MMP9; P4HA1; P4HA2;<br>SPP1                                                             | <a href="#">25781554</a> ; <a href="#">25286960</a> ; <a href="#">25733820</a> ;<br><a href="#">32315343</a> ; <a href="#">31268882</a> ; <a href="#">19065659</a> ;<br><a href="#">26849234</a> ; <a href="#">32641130</a> ; <a href="#">30935077</a> ;<br><a href="#">30675285</a> ; <a href="#">25733820</a> ; <a href="#">25733820</a> ;<br><a href="#">33292231</a> ; <a href="#">26384307</a> ; <a href="#">30846786</a> ;<br><a href="#">24832084</a> ; <a href="#">23874806</a> ; <a href="#">24623538</a> ;<br><a href="#">28114390</a> ; <a href="#">31036064</a> ; <a href="#">30857319</a> ;<br><a href="#">32679719</a>                                                                                                                                                                                                                               |
| Gene expression<br>(transcription)      | ACTL6A; CARM1; CCDC47;<br>CDH1; CDKN1B; CHD3;<br>CHD4; CTNNB1; DAXX;<br>DEK; ESR1; HDAC2;<br>KMT2D; LEO1; NUP62;<br>PARP1; PML; PSMC2;<br>RAD50; RANBP2; RNPS1;<br>SMARCA5; SMARCC2; SNRPB;<br>SPP1; SRRM1; SRSF4;<br>SRSF5; TAF15; TCEA1 | <a href="#">31028182</a> ; <a href="#">22876322</a> ; <a href="#">22403726</a> ;<br><a href="#">25286960</a> ; <a href="#">21454826</a> ; <a href="#">29888111</a> ;<br><a href="#">29888111</a> ; <a href="#">26645990</a> ; <a href="#">31384126</a> ;<br><a href="#">25733820</a> ; <a href="#">23593326</a> ; <a href="#">22112317</a> ;<br><a href="#">31864301</a> ; <a href="#">23755103</a> ; <a href="#">27092881</a> ;<br><a href="#">23762867</a> ; <a href="#">28969912</a> ; <a href="#">29130934</a> ;<br><a href="#">27979878</a> ; <a href="#">30684972</a> ; <a href="#">31355251</a> ;<br><a href="#">33633465</a> ; <a href="#">31028182</a> ; <a href="#">32983981</a> ;<br><a href="#">32679719</a> ; <a href="#">31911863</a> ; <a href="#">31355251</a> ;<br><a href="#">33163258</a> ; <a href="#">25733820</a> ; <a href="#">32877461</a> |
| Haemostasis                             | CCDC47; CD63; CD74;<br>CEACAM5; CLU; CYFIP2;<br>DAXX; F11R; HDAC2;<br>ITGA2; ITGAM; ITGB3;<br>KIF15; PLAUR; PRKAR1A;<br>PRKAR2A; PSAP; SLC16A1;<br>SMAP; TUBAL3                                                                           | <a href="#">22403726</a> ; <a href="#">32555395</a> ; <a href="#">33159014</a> ;<br><a href="#">32899298</a> ; <a href="#">31623106</a> ; <a href="#">30935077</a> ;<br><a href="#">31384126</a> ; <a href="#">30675285</a> ; <a href="#">22112317</a> ;<br><a href="#">25733820</a> ; <a href="#">33292231</a> ; <a href="#">26384307</a> ;<br><a href="#">29693365</a> ; <a href="#">12130664</a> ; <a href="#">22461635</a> ;<br><a href="#">31850214</a> ; <a href="#">23874806</a> ; <a href="#">29665298</a> ;<br><a href="#">30104481</a> ; <a href="#">30857319</a>                                                                                                                                                                                                                                                                                        |
| Immune system                           | ABI1; ACLY; ADAM10;<br>AHCYL1; ALCAM; ATAD3B;<br>B4GALT1; C1QC; CCDC47;<br>CD14; CD63; CD74;<br>CDH1; CDKN1B; CLU;<br>COL2A1; COL3A1; CTNNB1;<br>CTSH; CYFIP2; DNAJC3;<br>DNAJC5; ERAP1; FCGR3B;<br>FECH; GGH; GLB1;                      | <a href="#">25733820</a> ; <a href="#">23454913</a> ; <a href="#">25781554</a> ;<br><a href="#">26865667</a> ; <a href="#">29682175</a> ; <a href="#">33177874</a> ;<br><a href="#">31807118</a> ; <a href="#">22403726</a> ; <a href="#">22403726</a> ;<br><a href="#">25880896</a> ; <a href="#">32555395</a> ; <a href="#">33159014</a> ;<br><a href="#">25286960</a> ; <a href="#">21454826</a> ; <a href="#">31623106</a> ;<br><a href="#">31268882</a> ; <a href="#">19065659</a> ; <a href="#">26645990</a> ;<br><a href="#">22040021</a> ; <a href="#">30935077</a> ; <a href="#">31853186</a> ;<br><a href="#">33338880</a> ; <a href="#">31921832</a> ; <a href="#">32339157</a> ;<br><a href="#">31783595</a> ; <a href="#">31105744</a> ; <a href="#">32894095</a> ;                                                                                   |

|                       |                                                                                                                                                                                                                                                                                                                                                                                                                                                  |                                                                                                                                                                                                                                                                                                                                                                                                                                                                                                                                                                                                                                                                                                                                                                                                                                                                                                                                                                                                                                                                                                                                                                                                                                                                                                                                                                                                                                                                                                                                                                                                  |
|-----------------------|--------------------------------------------------------------------------------------------------------------------------------------------------------------------------------------------------------------------------------------------------------------------------------------------------------------------------------------------------------------------------------------------------------------------------------------------------|--------------------------------------------------------------------------------------------------------------------------------------------------------------------------------------------------------------------------------------------------------------------------------------------------------------------------------------------------------------------------------------------------------------------------------------------------------------------------------------------------------------------------------------------------------------------------------------------------------------------------------------------------------------------------------------------------------------------------------------------------------------------------------------------------------------------------------------------------------------------------------------------------------------------------------------------------------------------------------------------------------------------------------------------------------------------------------------------------------------------------------------------------------------------------------------------------------------------------------------------------------------------------------------------------------------------------------------------------------------------------------------------------------------------------------------------------------------------------------------------------------------------------------------------------------------------------------------------------|
|                       | GSTK1; HLA-A; HLA-DRB1;<br>HUWE1; IFI30; IFITM1;<br>IGF2R; ITGAM; JUP;<br>KIAA1324; KIF15; LGMN;<br>LTBR; MAOA; MME;<br>MMP9; MT2A; MUC16;<br>NUP62; OLFM4; PLAUR;<br>PML; PSAP; PSMC2;<br>PTPRC; RANBP2; S100A12;<br>S100P; SMAP; SNAP23;<br>STAT3; TRIM2; TRIM25;<br>TRIP12; TUBAL3; TWF1                                                                                                                                                      | <a href="#">21458040</a> ; <a href="#">28358435</a> ; <a href="#">33159014</a> ;<br><a href="#">31787999</a> ; <a href="#">30203794</a> ; <a href="#">27124937</a> ;<br><a href="#">29297146</a> ; <a href="#">33292231</a> ; <a href="#">23874806</a> ;<br><a href="#">32774497</a> ; <a href="#">29693365</a> ; <a href="#">16289307</a> ;<br><a href="#">20554747</a> ; <a href="#">25733820</a> ; <a href="#">24623538</a> ;<br><a href="#">28114390</a> ; <a href="#">26485755</a> ; <a href="#">31864301</a> ;<br><a href="#">27092881</a> ; <a href="#">24495253</a> ; <a href="#">12130664</a> ;<br><a href="#">28969912</a> ; <a href="#">23874806</a> ; <a href="#">29130934</a> ;<br><a href="#">25733820</a> ; <a href="#">30684972</a> ; <a href="#">32339157</a> ;<br><a href="#">24966918</a> ; <a href="#">30104481</a> ; <a href="#">28938593</a> ;<br><a href="#">28114390</a> ; <a href="#">25733820</a> ; <a href="#">30586414</a> ;<br><a href="#">33198194</a> ; <a href="#">30857319</a> ; <a href="#">24595016</a>                                                                                                                                                                                                                                                                                                                                                                                                                                                                                                                                                       |
| Metabolism            | ACLY; AHCYL1; AKR1C3;<br>ALDH18A1; APOC2; B4GALT1;<br>BCAT2; CARM1; CMPK1;<br>CSE1L; CYB5A; CYC1;<br>EPRS; FBP1; FECH;<br>FLOT1; GBE1; GGCT;<br>GLB1; GMPR; GSTK1;<br>HGD; HPGD; IGF2R;<br>LGMN; LTBP1; MAOA;<br>MCCC2; NQO1; NUP62;<br>OAT; PAPSS1; PLCB1;<br>PRKAR1A; PRKAR2A; PSAP;<br>PSMC2; RANBP2; RBKS;<br>RNPS1; RPIA; RPL10;<br>RPL13A; RPL27A; RPL28;<br>RPL29; RPLP1; RPS24;<br>SDHB; SLC16A1; SLC2A1;<br>SPP1; SUMO2; TCEA1;<br>TWF1 | <a href="#">23454913</a> ; <a href="#">26865667</a> ; <a href="#">33352741</a> ;<br><a href="#">32894095</a> ; <a href="#">21489304</a> ; <a href="#">31807118</a> ;<br><a href="#">31949641</a> ; <a href="#">22876322</a> ; <a href="#">26716509</a> ;<br><a href="#">31134156</a> ; <a href="#">26328264</a> ; <a href="#">32983981</a> ;<br><a href="#">31788113</a> ; <a href="#">29190956</a> ; <a href="#">31783595</a> ;<br><a href="#">26865667</a> ; <a href="#">33424936</a> ; <a href="#">31947591</a> ;<br><a href="#">32894095</a> ; <a href="#">23843231</a> ; <a href="#">21458040</a> ;<br><a href="#">28167798</a> ; <a href="#">31692912</a> ; <a href="#">29297146</a> ;<br><a href="#">16289307</a> ; <a href="#">23874806</a> ; <a href="#">25733820</a> ;<br><a href="#">27391266</a> ; <a href="#">28748640</a> ; <a href="#">27092881</a> ;<br><a href="#">27181389</a> ; <a href="#">22380844</a> ; <a href="#">30813939</a> ;<br><a href="#">22461635</a> ; <a href="#">31850214</a> ; <a href="#">23874806</a> ;<br><a href="#">29130934</a> ; <a href="#">30684972</a> ; <a href="#">27219024</a> ;<br><a href="#">31355251</a> ; <a href="#">30177747</a> ; <a href="#">21226949</a> ;<br><a href="#">32807831</a> ; <a href="#">20015385</a> ; <a href="#">30888986</a> ;<br><a href="#">26892688</a> ; <a href="#">32547595</a> ; <a href="#">19101990</a> ;<br><a href="#">25376524</a> ; <a href="#">29665298</a> ; <a href="#">31720081</a> ;<br><a href="#">32679719</a> ; <a href="#">25733820</a> ; <a href="#">32877461</a> ;<br><a href="#">24595016</a> |
| Metabolism of protein | ACTL6A; ADAM10; ALPL;<br>DAXX; EIF5; ESR1;<br>FCGR3B; FECH; GLB1;<br>KIAA1324; MME; MUC16;<br>PARP1; PGM3; PLAUR;<br>PRNP; PSAP; RAB21;<br>RANBP2; RPL10; RPL13A;<br>RPL27A; RPS24; SPP1;<br>STAT3; SYNE1; TES;<br>TUBAL3; UBA2                                                                                                                                                                                                                  | <a href="#">31028182</a> ; <a href="#">25781554</a> ; <a href="#">29659871</a> ;<br><a href="#">31384126</a> ; <a href="#">32726992</a> ; <a href="#">23593326</a> ;<br><a href="#">32339157</a> ; <a href="#">31783595</a> ; <a href="#">32894095</a> ;<br><a href="#">32774497</a> ; <a href="#">24623538</a> ; <a href="#">31864301</a> ;<br><a href="#">23762867</a> ; <a href="#">508567</a> ; <a href="#">12130664</a> ;<br><a href="#">32560489</a> ; <a href="#">23874806</a> ; <a href="#">19887623</a> ;<br><a href="#">30684972</a> ; <a href="#">21226949</a> ; <a href="#">32807831</a> ;<br><a href="#">20015385</a> ; <a href="#">19101990</a> ; <a href="#">32679719</a> ;<br><a href="#">28114390</a> ; <a href="#">26330482</a> ; <a href="#">24929083</a> ;<br><a href="#">30857319</a> ; <a href="#">22923510</a>                                                                                                                                                                                                                                                                                                                                                                                                                                                                                                                                                                                                                                                                                                                                                            |
| Metabolism of RNA     | ATRX; EPRS; ERMP1;<br>NUP62; PABPC1; PSMC2;<br>RANBP2; RBMX; RNPS1;<br>RPL10; RPL13A; RPL27A;<br>RPL28; RPL29; RPLP1;<br>RPS24; SET; SNRPB;<br>SNRPD2; SRRM1; SRSF4;<br>SRSF5; UPF1                                                                                                                                                                                                                                                              | <a href="#">31157162</a> ; <a href="#">31788113</a> ; <a href="#">29523216</a> ;<br><a href="#">27092881</a> ; <a href="#">31607220</a> ; <a href="#">29130934</a> ;<br><a href="#">30684972</a> ; <a href="#">24170611</a> ; <a href="#">31355251</a> ;<br><a href="#">21226949</a> ; <a href="#">32807831</a> ; <a href="#">20015385</a> ;<br><a href="#">30888986</a> ; <a href="#">26892688</a> ; <a href="#">32547595</a> ;<br><a href="#">19101990</a> ; <a href="#">26351531</a> ; <a href="#">32983981</a> ;<br><a href="#">32899298</a> ; <a href="#">31911863</a> ; <a href="#">31355251</a> ;<br><a href="#">33163258</a> ; <a href="#">32210576</a>                                                                                                                                                                                                                                                                                                                                                                                                                                                                                                                                                                                                                                                                                                                                                                                                                                                                                                                                  |

|                                               |                                                                                                                                                                                                                                                                                                                                                                            |                                                                                                                                                                                                                                                                                                                                                                                                                                                                                                                                                                                                                                                                                                                                                                                                                                                                                                                                                                                                                                                                                                                                                                                                                                                                                                                                                                                                                                                           |
|-----------------------------------------------|----------------------------------------------------------------------------------------------------------------------------------------------------------------------------------------------------------------------------------------------------------------------------------------------------------------------------------------------------------------------------|-----------------------------------------------------------------------------------------------------------------------------------------------------------------------------------------------------------------------------------------------------------------------------------------------------------------------------------------------------------------------------------------------------------------------------------------------------------------------------------------------------------------------------------------------------------------------------------------------------------------------------------------------------------------------------------------------------------------------------------------------------------------------------------------------------------------------------------------------------------------------------------------------------------------------------------------------------------------------------------------------------------------------------------------------------------------------------------------------------------------------------------------------------------------------------------------------------------------------------------------------------------------------------------------------------------------------------------------------------------------------------------------------------------------------------------------------------------|
| Muscle contraction                            | AHCYL1; AKAP9; ASPH; CALD1; LMOD1; MYH6; SORBS1; TTN                                                                                                                                                                                                                                                                                                                       | <a href="#">26865667</a> ; <a href="#">28448305</a> ; <a href="#">31934181</a> ; <a href="#">20579378</a> ; <a href="#">33312770</a> ; <a href="#">33217970</a> ; <a href="#">19583808</a> ; <a href="#">31864301</a>                                                                                                                                                                                                                                                                                                                                                                                                                                                                                                                                                                                                                                                                                                                                                                                                                                                                                                                                                                                                                                                                                                                                                                                                                                     |
| Neuronal system                               | DNAJC5; FLOT1; MAOA; MYO6; NPTN; PLCB1; PRKAR1A; PRKAR2A; SORBS1; TUBAL3                                                                                                                                                                                                                                                                                                   | <a href="#">33338880</a> ; <a href="#">26865667</a> ; <a href="#">25733820</a> ; <a href="#">32471032</a> ; <a href="#">27391266</a> ; <a href="#">30813939</a> ; <a href="#">22461635</a> ; <a href="#">31850214</a> ; <a href="#">19583808</a> ; <a href="#">30857319</a>                                                                                                                                                                                                                                                                                                                                                                                                                                                                                                                                                                                                                                                                                                                                                                                                                                                                                                                                                                                                                                                                                                                                                                               |
| Organelle biogenesis and maintenance          | AKAP9; CARM1; CYC1; IMMT; SMAP; TUBAL3                                                                                                                                                                                                                                                                                                                                     | <a href="#">28448305</a> ; <a href="#">22876322</a> ; <a href="#">32983981</a> ; <a href="#">32983981</a> ; <a href="#">30104481</a> ; <a href="#">30857319</a>                                                                                                                                                                                                                                                                                                                                                                                                                                                                                                                                                                                                                                                                                                                                                                                                                                                                                                                                                                                                                                                                                                                                                                                                                                                                                           |
| Programmed cell death                         | CD14; CDH1; CTNNB1; DIABLO; DSG2; FLOT1; HIST1H1A; HIST1H1D; PSMC2; STAT3                                                                                                                                                                                                                                                                                                  | <a href="#">25880896</a> ; <a href="#">25286960</a> ; <a href="#">26645990</a> ; <a href="#">30887763</a> ; <a href="#">30846786</a> ; <a href="#">26865667</a> ; <a href="#">33177874</a> ; <a href="#">33177874</a> ; <a href="#">29130934</a> ; <a href="#">28114390</a>                                                                                                                                                                                                                                                                                                                                                                                                                                                                                                                                                                                                                                                                                                                                                                                                                                                                                                                                                                                                                                                                                                                                                                               |
| Protein localisation                          | CYB5A; CYC1; FIS1; GSTK1; PRNP                                                                                                                                                                                                                                                                                                                                             | <a href="#">26328264</a> ; <a href="#">32983981</a> ; <a href="#">30018222</a> ; <a href="#">21458040</a> ; <a href="#">32560489</a>                                                                                                                                                                                                                                                                                                                                                                                                                                                                                                                                                                                                                                                                                                                                                                                                                                                                                                                                                                                                                                                                                                                                                                                                                                                                                                                      |
| Reproduction                                  | B4GALT1; RAD50; SMC1A; SYNE1; SYNE2                                                                                                                                                                                                                                                                                                                                        | <a href="#">31807118</a> ; <a href="#">27979878</a> ; <a href="#">30886832</a> ; <a href="#">26330482</a> ; <a href="#">31787999</a>                                                                                                                                                                                                                                                                                                                                                                                                                                                                                                                                                                                                                                                                                                                                                                                                                                                                                                                                                                                                                                                                                                                                                                                                                                                                                                                      |
| Signal transduction                           | ABI1; ADAM10; AHCYL1; AKAP9; AKR1C3; APOC2; B4GALT1; CARM1; CCDC47; CDH1; CDKN1B; CHD3; CHD4; COL2A1; COL3A1; COL4A2; COL5A1; CTNNB1; CTNND1; CYFIP2; ESR1; F11R; GAS1; GLB1; GSTK1; HDAC2; HSPH1; IARS2; ITGA2; ITGB3; JUP; KMT2D; LAMA1; LEO1; MDK; MMP9; MYH14; PARP1; PLCB1; PML; PRKAR1A; PRKAR2A; PSAP; PSMC2; RANBP2; SMC1A; SOX6; SPP1; STAT3; TCEA1; TFF3; TUBAL3 | <a href="#">25733820</a> ; <a href="#">25781554</a> ; <a href="#">26865667</a> ; <a href="#">28448305</a> ; <a href="#">33352741</a> ; <a href="#">21489304</a> ; <a href="#">31807118</a> ; <a href="#">22876322</a> ; <a href="#">22403726</a> ; <a href="#">25286960</a> ; <a href="#">21454826</a> ; <a href="#">29888111</a> ; <a href="#">29888111</a> ; <a href="#">31268882</a> ; <a href="#">19065659</a> ; <a href="#">26849234</a> ; <a href="#">32641130</a> ; <a href="#">26645990</a> ; <a href="#">23874806</a> ; <a href="#">30935077</a> ; <a href="#">23593326</a> ; <a href="#">30675285</a> ; <a href="#">33053339</a> ; <a href="#">32894095</a> ; <a href="#">21458040</a> ; <a href="#">22112317</a> ; <a href="#">22403726</a> ; <a href="#">25733820</a> ; <a href="#">25733820</a> ; <a href="#">26384307</a> ; <a href="#">23874806</a> ; <a href="#">31864301</a> ; <a href="#">24832084</a> ; <a href="#">23755103</a> ; <a href="#">23874806</a> ; <a href="#">28114390</a> ; <a href="#">33217970</a> ; <a href="#">23762867</a> ; <a href="#">30813939</a> ; <a href="#">28969912</a> ; <a href="#">22461635</a> ; <a href="#">31850214</a> ; <a href="#">23874806</a> ; <a href="#">29130934</a> ; <a href="#">30684972</a> ; <a href="#">30886832</a> ; <a href="#">21976109</a> ; <a href="#">32679719</a> ; <a href="#">28114390</a> ; <a href="#">32877461</a> ; <a href="#">30550483</a> ; <a href="#">30857319</a> |
| Transport of small molecules                  | AHCYL1; ANO1; APOC2; ASPH; IGF2R; ITGA2; PRKAR1A; PRKAR2A; PSMC2; RANBP2; SLC16A1; SLC2A1; TFRC; UBA2                                                                                                                                                                                                                                                                      | <a href="#">26865667</a> ; <a href="#">30651795</a> ; <a href="#">21489304</a> ; <a href="#">31934181</a> ; <a href="#">29297146</a> ; <a href="#">25733820</a> ; <a href="#">22461635</a> ; <a href="#">31850214</a> ; <a href="#">29130934</a> ; <a href="#">30684972</a> ; <a href="#">29665298</a> ; <a href="#">31720081</a> ; <a href="#">26308378</a> ; <a href="#">22923510</a>                                                                                                                                                                                                                                                                                                                                                                                                                                                                                                                                                                                                                                                                                                                                                                                                                                                                                                                                                                                                                                                                   |
| Vesicle mediated transport                    | ALPP; ANO1; COL3A1; COL4A2; HIP1; HSPH1; IGF2R; KIF15; MYO6; NQO1; RAB21; RABGAP1; SMAP; SNAP23; TFRC; TUBAL3; TWF1                                                                                                                                                                                                                                                        | <a href="#">7829680</a> ; <a href="#">30651795</a> ; <a href="#">19065659</a> ; <a href="#">26849234</a> ; <a href="#">25733820</a> ; <a href="#">22403726</a> ; <a href="#">29297146</a> ; <a href="#">29693365</a> ; <a href="#">32471032</a> ; <a href="#">28748640</a> ; <a href="#">19887623</a> ; <a href="#">29464034</a> ; <a href="#">30104481</a> ; <a href="#">28938593</a> ; <a href="#">26308378</a> ; <a href="#">30857319</a> ; <a href="#">24595016</a>                                                                                                                                                                                                                                                                                                                                                                                                                                                                                                                                                                                                                                                                                                                                                                                                                                                                                                                                                                                   |
| Found by GO pathway analysis but missing from | ABRACL; AGR3; ANKS1B; ARFIP1; BCLAF1; BRD3; CAPRIN1; CD276; CD82; CELF1; CIRBP; CMRK1;                                                                                                                                                                                                                                                                                     | <a href="#">30087246</a> ; <a href="#">30140383</a> ; <a href="#">29622464</a> ; <a href="#">25733820</a> ; <a href="#">18450952</a> ; <a href="#">29941483</a> ; <a href="#">31911863</a> ; <a href="#">27391266</a> ; <a href="#">19294001</a> ; <a href="#">26606540</a> ; <a href="#">33488112</a> ; <a href="#">26716509</a>                                                                                                                                                                                                                                                                                                                                                                                                                                                                                                                                                                                                                                                                                                                                                                                                                                                                                                                                                                                                                                                                                                                         |

|                               |                                                                                                                                                                                                                                                                                                                                                                          |                                                                                                                                                                                                                                                                                                                                                                                                                                                                                                                                                                                                                                                                                                                                                                                                                                                                                                                                                                                                                                                                                                                                                                                                                                                                           |
|-------------------------------|--------------------------------------------------------------------------------------------------------------------------------------------------------------------------------------------------------------------------------------------------------------------------------------------------------------------------------------------------------------------------|---------------------------------------------------------------------------------------------------------------------------------------------------------------------------------------------------------------------------------------------------------------------------------------------------------------------------------------------------------------------------------------------------------------------------------------------------------------------------------------------------------------------------------------------------------------------------------------------------------------------------------------------------------------------------------------------------------------------------------------------------------------------------------------------------------------------------------------------------------------------------------------------------------------------------------------------------------------------------------------------------------------------------------------------------------------------------------------------------------------------------------------------------------------------------------------------------------------------------------------------------------------------------|
| Reactome®<br>network analysis | COX7A2; CTSH; CYB5A;<br>DNAH14; DSG2; EIF3J;<br>FAM83G; FARP1; HDGFRP2;<br>IGFBP2; LRBA; LSP1;<br>LUC7L; MACF1; MAP1B;<br>MTDH; NAV3; NEFM;<br>NOL3; PAWR; PDS5B;<br>PDZD2; PKHD1L1; PLXNB2;<br>PNN; PODXL; RALGAPA1;<br>REXO1; RRBP1; S100A16;<br>SART3; SCARA3; SLC9A3R1;<br>SLK; TACSTD2; TCEAL2;<br>TCEAL4; TMEM165; TNFAIP2;<br>TOP1; TTC1; YBX3;<br>ZC3H13; ZRANB2 | <a href="#">21458040</a> ; <a href="#">22040021</a> ; <a href="#">26328264</a> ;<br><a href="#">29464034</a> ; <a href="#">30846786</a> ; <a href="#">31887549</a> ;<br><a href="#">28078827</a> ; <a href="#">20015385</a> ; <a href="#">24692842</a> ;<br><a href="#">26045339</a> ; <a href="#">25733820</a> ; <a href="#">21965274</a> ;<br><a href="#">22403726</a> ; <a href="#">30935077</a> ; <a href="#">25733820</a> ;<br><a href="#">21687633</a> ; <a href="#">31787999</a> ; <a href="#">28088687</a> ;<br><a href="#">26042464</a> ; <a href="#">28008141</a> ; <a href="#">25733820</a> ;<br><a href="#">31338870</a> ; <a href="#">29194195</a> ; <a href="#">32654393</a> ;<br><a href="#">19784388</a> ; <a href="#">32615943</a> ; <a href="#">29464034</a> ;<br><a href="#">29079795</a> <a href="#">30684972</a> ; <a href="#">22559235</a> ;<br><a href="#">11092984</a> ; <a href="#">26559525</a> ; <a href="#">32120995</a> ;<br><a href="#">20015385</a> ; <a href="#">21892093</a> ; <a href="#">30655845</a> ;<br><a href="#">29079795</a> ; <a href="#">25733820</a> ; <a href="#">26716509</a> ;<br><a href="#">25733820</a> ; <a href="#">32547595</a> ; <a href="#">33602962</a> ;<br><a href="#">23755103</a> ; <a href="#">31256208</a> |
|-------------------------------|--------------------------------------------------------------------------------------------------------------------------------------------------------------------------------------------------------------------------------------------------------------------------------------------------------------------------------------------------------------------------|---------------------------------------------------------------------------------------------------------------------------------------------------------------------------------------------------------------------------------------------------------------------------------------------------------------------------------------------------------------------------------------------------------------------------------------------------------------------------------------------------------------------------------------------------------------------------------------------------------------------------------------------------------------------------------------------------------------------------------------------------------------------------------------------------------------------------------------------------------------------------------------------------------------------------------------------------------------------------------------------------------------------------------------------------------------------------------------------------------------------------------------------------------------------------------------------------------------------------------------------------------------------------|
