# Supplementary material for: Identification of Potentially Novel Molecular Targets of Endometrial Cancer Using a Non-Biased Proteomic Approach
Source: MDPI journal article supplement (doi:10.3390/cancers15184665), 2023-09-21
Supplement: s1 [file s1]

**A.H. Taylor, J.C. Konje and T. Ayakannu – “Identification of Potentially Novel Molecular Targets of Endometrial Cancer Using a Non-Biased Proteomic Approach”**

**Supplemental Table S1.** The top 100 proteins differentially up-regulated in endometrial cancer relative to the level in atrophic endometrium.

The proteins presented in this table were identified by using proteome analysis of 4 endometrial cancer samples and 4 atrophic (normal) endometrial biopsies. After peptide selection and *in silico* analyses of peptide signals the data were analysed through the Reactome® pathway database (<https://reactome.org/>) and PantherGO classification system version 15.0 (released 14-02-2020) that contains 15702 protein families divided into 123989 functionally distinct protein subfamilies (<http://pantherdb.org/webservices/go/overrep.jsp>) for biological characterisation.

| Gene Symbol†          | Accession Number‡ | Protein name                                                         | Fold Change | p-value* |
|-----------------------|-------------------|----------------------------------------------------------------------|-------------|----------|
| LAMP2 <sup>B</sup>    | P13473            | Lysosome-associated membrane glycoprotein 2                          | 29.0        | 0.056    |
| HIST1H1B <sup>B</sup> | P16401            | Histone H1.5                                                         | 25.0        | 0.038    |
| LRRFIP1 <sup>B</sup>  | Q32MZ4            | Leucine-rich repeat flightless-interacting protein 1                 | 20.0        | 0.049    |
| EPRS <sup>B</sup>     | P07814            | Bifunctional glutamate/proline--tRNA ligase                          | 18.0        | 0.048    |
| RPLP2 <sup>B</sup>    | H0YDD8            | 60S acidic ribosomal protein P2 (Fragment)                           | 16.0        | 0.048    |
| RPL3 <sup>B</sup>     | P39023            | 60S ribosomal protein L3                                             | 15.0        | 0.042    |
| GAA <sup>B</sup>      | P10253            | Lysosomal alpha-glucosidase                                          | 15.0        | 0.042    |
| RPL17 <sup>B</sup>    | J3KRX5 (+2)       | 60S ribosomal protein L17 (Fragment)                                 | 14.0        | 0.003    |
| MARCKSL1 <sup>B</sup> | P49006            | MARCKS-related protein                                               | 12.0        | 0.051    |
| EIF3C <sup>B</sup>    | H3BRV0 (+1)       | Eukaryotic translation initiation factor 3 subunit C                 | 12.0        | 0.021    |
| EIF3A <sup>B</sup>    | Q14152            | Eukaryotic translation initiation factor 3 subunit A                 | 11.0        | 0.055    |
| LUC7L <sup>B</sup>    | A8MYV2 (+1)       | LUC7-like ( <i>S. cerevisiae</i> )                                   | 11.0        | 0.035    |
| GSR <sup>B</sup>      | P00390            | Glutathione reductase, mitochondrial                                 | 11.0        | 0.042    |
| DYNC1I2 <sup>B</sup>  | Q13409-6          | Isoform 2F of Cytoplasmic dynein 1 intermediate chain 2              | 10.0        | 0.047    |
| MLEC <sup>B</sup>     | Q14165            | Malectin                                                             | 10.0        | 0.029    |
| HSD17B4 <sup>B</sup>  | E7ER27            | Peroxisomal multifunctional enzyme type 2                            | 9.0         | 0.056    |
| PAFAH1B1 <sup>B</sup> | P43034            | Platelet-activating factor acetylhydrolase IB subunit alpha          | 9.0         | 0.042    |
| FLNB <sup>B</sup>     | E7EN95 (+1)       | Filamin-B                                                            | 8.4         | 0.056    |
| ASPH <sup>B</sup>     | Q12797            | Aspartyl/asparaginyl beta-hydroxylase                                | 8.0         | 0.038    |
| HSPH1 <sup>B</sup>    | Q92598-2          | Isoform Beta of Heat shock protein 105 kDa                           | 8.0         | 0.018    |
| ERO1L <sup>B</sup>    | Q96HE7            | ERO1-like protein alpha                                              | 7.5         | 0.048    |
| COPB2 <sup>B</sup>    | B4DZ18 (+1)       | Coatomer protein complex, subunit beta 2 (Beta prime), isoform CRA_β | 7.5         | 0.026    |
| RRBP1 <sup>B</sup>    | Q9P2E9            | Ribosome-binding protein 1                                           | 7.1         | 0.004    |
| STMN1 <sup>B</sup>    | P16949            | Stathmin                                                             | 7.0         | 0.054    |
| SCP2 <sup>B</sup>     | P22307-8          | Isoform 8 of Non-specific lipid-transfer protein                     | 7.0         | 0.044    |
| S100A16 <sup>B</sup>  | Q96FQ6            | Protein S100-A16                                                     | 7.0         | 0.044    |
| YBX3 <sup>B</sup>     | P16989 (+1)       | Y-box-binding protein 3                                              | 7.0         | 0.014    |
| RPL7 <sup>B</sup>     | P18124            | 60S ribosomal protein L7                                             | 6.5         | 0.057    |
| SRSF6 <sup>B</sup>    | Q13247            | Serine/arginine-rich splicing factor 6                               | 6.5         | 0.032    |
| SRSF4 <sup>B</sup>    | Q08170            | Serine/arginine-rich splicing factor 4                               | 6.5         | 0.018    |
| LUC7L2 <sup>B</sup>   | Q9Y383            | Putative RNA-binding protein Luc7-like 2                             | 6.3         | 0.046    |
| SELENBP1 <sup>B</sup> | Q13228            | Selenium-binding protein 1                                           | 6.2         | 0.036    |

|                        |             |                                                                |     |        |
|------------------------|-------------|----------------------------------------------------------------|-----|--------|
| TGOLN2 <sup>B</sup>    | F8WBK2 (+5) | Trans-Golgi network integral membrane protein 2                | 6.0 | 0.059  |
| KHSRP <sup>B</sup>     | Q92945      | Far upstream element-binding protein 2                         | 6.0 | 0.023  |
| IGKV2D-28 <sup>B</sup> | P06309      | Ig kappa chain V-II region GM607 (Fragment)                    | 6.0 | 0.021  |
| CTSH <sup>B</sup>      | P09668      | Pro-cathepsin H                                                | 6.0 | 0.021  |
| RAD23B <sup>B</sup>    | P54727      | UV excision repair protein RAD23 homolog B                     | 6.0 | 0.017  |
| LAP3 <sup>B</sup>      | P28838      | Cytosol aminopeptidase                                         | 5.5 | 0.034  |
| CD74 <sup>B</sup>      | H0YBZ2 (+2) | HLA class II histocompatibility antigen gamma chain (Fragment) | 5.0 | 0.054  |
| CHMP5 <sup>B</sup>     | Q9NZZ3-2    | Isoform 2 of Charged multivesicular body protein 5             | 5.0 | 0.054  |
| NUP62 <sup>B</sup>     | M0QXN5 (+1) | Nuclear pore glycoprotein p62                                  | 5.0 | 0.054  |
| SUMO2 <sup>B</sup>     | P61956      | Small ubiquitin-related modifier 2                             | 5.0 | 0.054  |
| SUMO3 <sup>B</sup>     | A8MU27 (+2) | Small ubiquitin-related modifier 3                             | 5.0 | 0.054  |
| NUCB1 <sup>B</sup>     | Q02818      | Nucleobindin-1                                                 | 5.0 | 0.053  |
| PLS1 <sup>B</sup>      | Q14651      | Plastin-1                                                      | 5.0 | 0.049  |
| RNASET2 <sup>B</sup>   | D6REQ6 (+2) | Ribonuclease T2                                                | 5.0 | 0.037  |
| FUS <sup>B</sup>       | P35637 (+1) | RNA-binding protein FUS                                        | 5.0 | 0.033  |
| CMPK1 <sup>B</sup>     | P30085      | UMP-CMP kinase                                                 | 5.0 | 0.033  |
| C19orf10 <sup>B</sup>  | Q969H8      | UPF0556 protein C19orf10                                       | 5.0 | 0.033  |
| HLA-B <sup>B</sup>     | Q29940      | HLA class I histocompatibility antigen, B-59 alpha chain       | 4.7 | 0.044  |
| FLOT1 <sup>B</sup>     | B0V109      | Flotillin-1 (Fragment)                                         | 4.5 | 0.049  |
| LAMP1 <sup>B</sup>     | P11279      | Lysosome-associated membrane glycoprotein 1                    | 4.4 | 0.039  |
| ILF3 <sup>B</sup>      | Q12906      | Interleukin enhancer-binding factor 3                          | 4.3 | 0.058  |
| MARCKS <sup>B</sup>    | P29966      | Myristoylated alanine-rich C-kinase substrate                  | 4.2 | 0.050  |
| CAPS <sup>B</sup>      | Q13938      | Calcyphosin                                                    | 4.2 | 0.031  |
| YBX1 <sup>B</sup>      | P67809      | Nuclease-sensitive element-binding protein 1                   | 4.1 | <0.001 |
| SND1 <sup>B</sup>      | Q7KZF4      | Staphylococcal nuclease domain-containing protein 1            | 4.0 | 0.055  |
| PRPF8 <sup>B</sup>     | Q6P2Q9      | Pre-mRNA-processing-splicing factor 8                          | 4.0 | 0.054  |
| USO1 <sup>B</sup>      | F5GYR8      | General vesicular transport factor p115                        | 4.0 | 0.007  |
| HNRNPAB <sup>B</sup>   | D6RBZ0      | Heterogeneous nuclear ribonucleoprotein A/B                    | 3.8 | 0.019  |
| ST13P4 <sup>B</sup>    | Q8IZP2      | Putative protein FAM10A4                                       | 3.7 | 0.058  |
| HP1BP3 <sup>B</sup>    | Q5SSJ5      | Heterochromatin protein 1-binding protein 3                    | 3.6 | 0.059  |
| TM20nm <sup>B</sup>    | A6NL28      | Putative tropomyosin alpha-3 chain-like protein                | 3.5 | 0.020  |
| RPL7A <sup>B</sup>     | P62424      | 60S ribosomal protein L7a                                      | 3.4 | 0.059  |
| KRT18 <sup>B</sup>     | P05783      | Keratin, type I cytoskeletal 18                                | 3.4 | 0.033  |
| EPB41L2 <sup>B</sup>   | E9PK52      | Band 4.1-like protein 2                                        | 3.3 | 0.057  |
| SRSF2 <sup>B</sup>     | J3KP15 (+1) | Serine/arginine-rich-splicing factor 2 (Fragment)              | 3.1 | 0.033  |
| PKM <sup>B</sup>       | P14618-2    | Isoform M1 of Pyruvate kinase PKM                              | 3.0 | 0.046  |
| EPCAM <sup>B</sup>     | B5MCA4      | Epithelial cell adhesion molecule                              | 3.0 | 0.052  |
| SCP2 <sup>B</sup>      | P22307      | Non-specific lipid-transfer protein                            | 3.0 | 0.044  |
| NOP58 <sup>B</sup>     | Q9Y2X3      | Nucleolar protein 58                                           | 3.0 | 0.039  |
| SSR1 <sup>B</sup>      | P43307      | Translocon-associated protein subunit alpha                    | 3.0 | 0.039  |
| PKM <sup>B</sup>       | P14618      | Pyruvate kinase PKM                                            | 3.0 | 0.059  |
| HNRNPUB <sup>B</sup>   | Q00839      | Heterogeneous nuclear ribonucleoprotein U                      | 2.8 | 0.035  |
| CAT <sup>B</sup>       | P04040      | Catalase                                                       | 2.8 | 0.047  |
| RPS25 <sup>B</sup>     | P62851      | 40S ribosomal protein S25                                      | 2.8 | 0.054  |

|                        |             |                                                                    |     |       |
|------------------------|-------------|--------------------------------------------------------------------|-----|-------|
| DHX15 <sup>B</sup>     | O43143      | Putative pre-mRNA-splicing factor ATP-dependent RNA helicase DHX15 | 2.7 | 0.050 |
| TPT1 <sup>B</sup>      | E9PJF7      | Translationally-controlled tumor protein (Fragment)                | 2.6 | 0.053 |
| NME1 <sup>B</sup>      | P15531-2    | Isoform 2 of Nucleoside diphosphate kinase A                       | 2.6 | 0.049 |
| POTEJ <sup>B</sup>     | P0CG39      | POTE ankyrin domain family member J                                | 2.6 | 0.052 |
| WFDC2 <sup>B</sup>     | Q14508      | WAP four-disulfide core domain protein 2                           | 2.5 | 0.061 |
| HSP90AB2P <sup>B</sup> | Q58FF8      | Putative heat shock protein HSP 90-beta 2                          | 2.4 | 0.043 |
| PSMC2 <sup>B</sup>     | P35998      | 26S protease regulatory subunit 7                                  | 2.3 | 0.054 |
| CKAP4 <sup>B</sup>     | Q07065      | Cytoskeleton-associated protein 4                                  | 2.3 | 0.044 |
| APOE <sup>B</sup>      | P02649      | Apolipoprotein E                                                   | 2.2 | 0.054 |
| PGRMC2 <sup>B</sup>    | O15173      | Membrane-associated progesterone receptor component 2              | 2.1 | 0.054 |
| HSPA4 <sup>B</sup>     | P34932      | Heat shock 70 kDa protein 4                                        | 2.1 | 0.030 |
| HYOU1 <sup>B</sup>     | Q9Y4L1      | Hypoxia up-regulated protein 1                                     | 2.1 | 0.040 |
| CANX <sup>B</sup>      | B4DGP8 (+1) | Calnexin                                                           | 2.1 | 0.023 |
| SRSF1 <sup>B</sup>     | J3KTL2 (+1) | Serine/arginine-rich-splicing factor 1                             | 2.0 | 0.044 |
| KRT8 <sup>B</sup>      | P05787      | Keratin, type II cytoskeletal 8                                    | 2.0 | 0.032 |
| NCL <sup>2</sup>       | P19338      | Nucleolin                                                          | 1.9 | 0.001 |
| ERP29 <sup>B</sup>     | P30040      | Endoplasmic reticulum resident protein 29                          | 1.9 | 0.049 |
| HSPA5 <sup>B</sup>     | P11021      | 78 kDa glucose-regulated protein                                   | 1.9 | 0.038 |
| CALR <sup>B</sup>      | P27797      | Calreticulin                                                       | 1.9 | 0.015 |
| P4HB <sup>B</sup>      | I3L0S0      | Protein disulfide-isomerase (Fragment)                             | 1.9 | 0.047 |
| EIF2S1 <sup>B</sup>    | P05198      | Eukaryotic translation initiation factor 2 subunit 1               | 1.9 | 0.038 |
| PRKCSH <sup>2</sup>    | K7ELL7      | Glucosidase 2 subunit beta                                         | 1.7 | 0.031 |
| D6RGY2 <sup>B</sup>    | SRP9        | Signal recognition particle 9 kDa protein                          | 1.7 | 0.015 |
| K7ELL7 <sup>B</sup>    | MPO         | Isoform H7 of Myeloperoxidase                                      | 1.7 | 0.031 |

<sup>†</sup>Superscript after each gene symbol denotes increased protein expression in Type 2 EC (2); or both types of EC (B); (N.B. none of the 100 top up-regulated proteins were increased in Type 1 EC alone); <sup>‡</sup>Uniprot protein accession number; \*p-value = unpaired Student one-tailed t-test as using parameters presented by Dalman *et al.* (2012).

Dalman, M.R., Deeter, A., Nimishakavi, G. *et al.* Fold change and p-value cutoffs significantly alter microarray interpretations. *BMC Bioinformatics* **13** (Suppl 2), S11 (2012). <https://doi.org/10.1186/1471-2105-13-S2-S11>.
