# Supplementary material for: Identification of Potentially Novel Molecular Targets of Endometrial Cancer Using a Non-Biased Proteomic Approach
Source: MDPI journal article supplement (doi:10.3390/cancers15184665), 2023-09-21
Supplement: s1 [file s1]

**A.H. Taylor, J.C. Konje and T. Ayakannu – “Identification of Potentially Novel Molecular Targets of Endometrial Cancer Using a Non-Biased Proteomic Approach”**

**Supplemental Table S3.** Proteins not previously associated with endometrial cancer **BUT** known to be associated with other forms of cancer.

| Reactome® Network                      | Proteins identified in network                                                                                                                                                                                                                                                                                                                   | EC Type*                                                                                                                                                                                                                                                               | PubMed id                                                                                                                                                                                                                                                                                                                                                                                                                                                                                                                                                                                                                                                                                                                                                                                                                                                                                                                                                                                                                                                                                                                                                                                                           |
|----------------------------------------|--------------------------------------------------------------------------------------------------------------------------------------------------------------------------------------------------------------------------------------------------------------------------------------------------------------------------------------------------|------------------------------------------------------------------------------------------------------------------------------------------------------------------------------------------------------------------------------------------------------------------------|---------------------------------------------------------------------------------------------------------------------------------------------------------------------------------------------------------------------------------------------------------------------------------------------------------------------------------------------------------------------------------------------------------------------------------------------------------------------------------------------------------------------------------------------------------------------------------------------------------------------------------------------------------------------------------------------------------------------------------------------------------------------------------------------------------------------------------------------------------------------------------------------------------------------------------------------------------------------------------------------------------------------------------------------------------------------------------------------------------------------------------------------------------------------------------------------------------------------|
| Autophagy                              | ABCC6; DYNC1I2; LAMP2;<br>PCNT; UBA52                                                                                                                                                                                                                                                                                                            | <u>2; B; B;</u><br><u>2; B</u>                                                                                                                                                                                                                                         | <a href="#">31565477</a> ; <a href="#">31516392</a> ; <a href="#">27627761</a> ;<br><a href="#">28426876</a> ; <a href="#">27270322</a>                                                                                                                                                                                                                                                                                                                                                                                                                                                                                                                                                                                                                                                                                                                                                                                                                                                                                                                                                                                                                                                                             |
| Cell cycle                             | ARPP19; CAST; CETN2;<br>DCTN1; DKC1; DYNC1I2;<br>ENSA; NHP2; NUP205;<br>PBDC1; PCNT; PPP1R12A;<br>PSMB7; PSMD10; PSMD3;<br>PSMD6; PSMD8; RAB2A;<br>RCC1; RCC2; RPS27;<br>TMPO; UBA52; USO1                                                                                                                                                       | <u>2; B; B;</u><br><u>B; 2; B;</u><br><u>B; 2; 2;</u><br><u>1; 2; 2;</u><br><u>B; 2; B;</u><br><u>2; 2; 1;</u><br><u>2; 2; B;</u><br><u>B; B; B</u>                                                                                                                    | <a href="#">28361685</a> ; <a href="#">11895905</a> ; <a href="#">30375513</a> ;<br><a href="#">33198314</a> ; <a href="#">31857720</a> ; <a href="#">31516392</a> ;<br><a href="#">31348270</a> ; <a href="#">28289249</a> ; <a href="#">32467671</a> ;<br><a href="#">25428507</a> ; <a href="#">28426876</a> ; <a href="#">26113782</a> ;<br><a href="#">24758163</a> ; <a href="#">36028821</a> ; <a href="#">33193699</a> ;<br><a href="#">26291246</a> ; <a href="#">24889965</a> ; <a href="#">26379393</a> ;<br><a href="#">30280037</a> ; <a href="#">28869598</a> ; <a href="#">28923911</a> ;<br><a href="#">33371267</a> ; <a href="#">27270322</a> ; <a href="#">28969018</a>                                                                                                                                                                                                                                                                                                                                                                                                                                                                                                                          |
| Cell-cell communication                | LAMA3                                                                                                                                                                                                                                                                                                                                            | <u>B</u>                                                                                                                                                                                                                                                               | <a href="#">32555663</a>                                                                                                                                                                                                                                                                                                                                                                                                                                                                                                                                                                                                                                                                                                                                                                                                                                                                                                                                                                                                                                                                                                                                                                                            |
| Cellular responses to external stimuli | ATP6V1A; DCTN1; DYNC1I2;<br>EIF2S2; EIF2S3; FASN;<br>HSBP1; KIAA1967; MT1X;<br>NUP205; PSMA3; PSMA6;<br>PSMB7; PSMD10; PSMD3;<br>PSMD6; PSMD8; RPL14;<br>RPL15; RPL17; RPL18A;<br>RPL19; RPL23A; RPL24;<br>RPL3; RPL32; RPL34;<br>RPL35; RPL35A; RPL36;<br>RPS11; RPS13; RPS21;<br>RPS23; RPS27; RPS28;<br>TXNRD1; UBA52                         | <u>B; B; B;</u><br><u>B; B; 2;</u><br><u>B; B; 2;</u><br><u>2; B; B;</u><br><u>B; 2; B;</u><br><u>2; 2; 1;</u><br><u>1; B; B;</u><br><u>B; B; 1;</u><br><u>B; B; 1;</u><br><u>1; B; B;</u><br><u>B; B; B;</u><br><u>B; B; B;</u><br><u>1; B</u>                        | <a href="#">28592880</a> ; <a href="#">33198314</a> ; <a href="#">31516392</a> ;<br><a href="#">17989776</a> ; <a href="#">29320577</a> ; <a href="#">25947066</a> ;<br><a href="#">28686225</a> ; <a href="#">24206917</a> ; <a href="#">25763113</a> ;<br><a href="#">32467671</a> ; <a href="#">29304754</a> ; <a href="#">31086659</a> ;<br><a href="#">24758163</a> ; <a href="#">36028821</a> ; <a href="#">33193699</a> ;<br><a href="#">26291246</a> ; <a href="#">24889965</a> ; <a href="#">28264936</a> ;<br><a href="#">26892688</a> ; <a href="#">26597576</a> ; <a href="#">30678426</a> ;<br><a href="#">24950402</a> ; <a href="#">28147343</a> ; <a href="#">30650663</a> ;<br><a href="#">29530001</a> ; <a href="#">25864709</a> ; <a href="#">29530001</a> ;<br><a href="#">29530001</a> ; <a href="#">29530001</a> ; <a href="#">32640226</a> ;<br><a href="#">32395510</a> ; <a href="#">29530001</a> ; <a href="#">27233751</a> ;<br><a href="#">30061686</a> ; <a href="#">28923911</a> ; <a href="#">31350888</a> ;<br><a href="#">20420945</a> ; <a href="#">27270322</a>                                                                                                                 |
| Chromatin organisation                 | HIST1H2AG; KDM5B                                                                                                                                                                                                                                                                                                                                 | <u>B; 2</u>                                                                                                                                                                                                                                                            | <a href="#">25003966</a> ; <a href="#">27480251</a>                                                                                                                                                                                                                                                                                                                                                                                                                                                                                                                                                                                                                                                                                                                                                                                                                                                                                                                                                                                                                                                                                                                                                                 |
| Circadian clock                        | UBA52; USP9X                                                                                                                                                                                                                                                                                                                                     | <u>B; 2</u>                                                                                                                                                                                                                                                            | <a href="#">27270322</a> ; <a href="#">28103826</a>                                                                                                                                                                                                                                                                                                                                                                                                                                                                                                                                                                                                                                                                                                                                                                                                                                                                                                                                                                                                                                                                                                                                                                 |
| Developmental Biology                  | ADIRF; APOC1; COL5A3;<br>DPPA4; EIF4G1; EVPL;<br>FARP2; FLNB; KRT16;<br>KRT6B; KRT77; MYL12B;<br>NCSTN; PSMA3; PSMA6;<br>PSMB7; PSMD10; PSMD3;<br>PSMD6; PSMD8; RPL14;<br>RPL15; RPL17; RPL18A;<br>RPL19; RPL23A; RPL24;<br>RPL3; RPL32; RPL34;<br>RPL35; RPL35A; RPL36;<br>RPS11; RPS13; RPS21;<br>RPS23; RPS27; RPS28;<br>SDC2; SPTBN2; SUMF2; | <u>2; 1; 2;</u><br><u>2; B; 2;</u><br><u>2; B; B;</u><br><u>B; 2; B;</u><br><u>1; B; B;</u><br><u>B; 2; B;</u><br><u>2; 2; 1;</u><br><u>1; B; B;</u><br><u>B; B; 1;</u><br><u>B; B; 1;</u><br><u>1; B; B;</u><br><u>B; B; B;</u><br><u>B; B; B;</u><br><u>B; 2; B;</u> | <a href="#">32596316</a> ; <a href="#">30732558</a> ; <a href="#">27597234</a> ;<br><a href="#">23963736</a> ; <a href="#">18427574</a> ; <a href="#">29587367</a> ;<br><a href="#">25285016</a> ; <a href="#">30764547</a> ; <a href="#">32083078</a> ;<br><a href="#">25997063</a> ; <a href="#">22278369</a> ; <a href="#">25029196</a> ;<br><a href="#">25887147</a> ; <a href="#">29304754</a> ; <a href="#">31086659</a> ;<br><a href="#">24758163</a> ; <a href="#">36028821</a> ; <a href="#">33193699</a> ;<br><a href="#">26291246</a> ; <a href="#">24889965</a> ; <a href="#">28264936</a> ;<br><a href="#">26892688</a> ; <a href="#">26597576</a> ; <a href="#">30678426</a> ;<br><a href="#">25300887</a> ; <a href="#">28147343</a> ; <a href="#">30650663</a> ;<br><a href="#">30105457</a> ; <a href="#">25864709</a> ; <a href="#">29530001</a> ;<br><a href="#">29530001</a> ; <a href="#">28923911</a> ; <a href="#">32640226</a> ;<br><a href="#">26892688</a> ; <a href="#">29530001</a> ; <a href="#">27233751</a> ;<br><a href="#">30061686</a> ; <a href="#">28923911</a> ; <a href="#">27741504</a> ;<br><a href="#">26293675</a> ; <a href="#">28793054</a> ; <a href="#">3229626</a> ; |

|                                      |                                                                                                                                                                                                                                                                                                                                                                                                                                                    |                                                                                                                                                                                                                     |                                                                                                                                                                                                                                                                                                                                                                                                                                                                                                                                                                                                                                                                                                                                                                                                                                                                                                                                                                                                                                                                                                                                                                                                                                                                                                                                                                                                                                                                                                                                                                   |
|--------------------------------------|----------------------------------------------------------------------------------------------------------------------------------------------------------------------------------------------------------------------------------------------------------------------------------------------------------------------------------------------------------------------------------------------------------------------------------------------------|---------------------------------------------------------------------------------------------------------------------------------------------------------------------------------------------------------------------|-------------------------------------------------------------------------------------------------------------------------------------------------------------------------------------------------------------------------------------------------------------------------------------------------------------------------------------------------------------------------------------------------------------------------------------------------------------------------------------------------------------------------------------------------------------------------------------------------------------------------------------------------------------------------------------------------------------------------------------------------------------------------------------------------------------------------------------------------------------------------------------------------------------------------------------------------------------------------------------------------------------------------------------------------------------------------------------------------------------------------------------------------------------------------------------------------------------------------------------------------------------------------------------------------------------------------------------------------------------------------------------------------------------------------------------------------------------------------------------------------------------------------------------------------------------------|
|                                      | THRAP3; TSC22D1; UBA52;<br>USP9X                                                                                                                                                                                                                                                                                                                                                                                                                   | 2; 2; B;<br><u>2</u>                                                                                                                                                                                                | <a href="#">29112714</a> ; <a href="#">23442798</a> ; <a href="#">27270322</a> ;<br><a href="#">28103826</a>                                                                                                                                                                                                                                                                                                                                                                                                                                                                                                                                                                                                                                                                                                                                                                                                                                                                                                                                                                                                                                                                                                                                                                                                                                                                                                                                                                                                                                                      |
| Digestion and<br>absorption          | There are no proteins to report in this<br>category.                                                                                                                                                                                                                                                                                                                                                                                               |                                                                                                                                                                                                                     |                                                                                                                                                                                                                                                                                                                                                                                                                                                                                                                                                                                                                                                                                                                                                                                                                                                                                                                                                                                                                                                                                                                                                                                                                                                                                                                                                                                                                                                                                                                                                                   |
| Disease                              | ABCC6; AP1G1; ATP1B3;<br>CAST; CHMP5; CYFIP1;<br>DYNC1I2; FASN; FLNB;<br>GAA; GALE; GGT1;<br>GOLGB1; HIST1H2AG; LRRFIP1;<br>NCSTN; NUP205; PABPN1;<br>PCCB; PSMA3; PSMA6;<br>PSMB7; PSMD10; PSMD3;<br>PSMD6; PSMD8; RCC1;<br>RHOG; RPL14; RPL15;<br>RPL17; RPL18A; RPL19;<br>RPL23A; RPL24; RPL3;<br>RPL32; RPL34; RPL35;<br>RPL35A; RPL36; RPS11;<br>RPS13; RPS21; RPS23;<br>RPS27; RPS28; SDC1;<br>SDC2; SGSH; SH3GL1;<br>SLC25A4; TXNRD1; UBA52 | 2; B; 1;<br>B; B; B;<br>B; 2; B;<br>B; B; 1;<br>2; B; B;<br>1; 2; 2;<br>B; B; B;<br>B; 2; B;<br>2; 2; 2;<br>2; 1; 1;<br>B; B; B;<br>B; B; B;<br>B; 1; 1;<br>B; B; B;<br>B; B; B;<br>B; B; 1;<br>B; 2; B;<br>B; 1; B | <a href="#">31565477</a> ; <a href="#">31002129</a> ; <a href="#">24236063</a> ;<br><a href="#">11895905</a> ; <a href="#">30678426</a> ; <a href="#">29572294</a> ;<br><a href="#">31516392</a> ; <a href="#">25947066</a> ; <a href="#">31665330</a> ;<br><a href="#">8660303</a> ; <a href="#">31272438</a> ; <a href="#">27381639</a> ;<br><a href="#">20685852</a> ; <a href="#">25003966</a> ; <a href="#">26224133</a> ;<br><a href="#">25887147</a> ; <a href="#">32467671</a> ; <a href="#">30787966</a> ;<br><a href="#">26627478</a> ; <a href="#">29304754</a> ; <a href="#">31086659</a> ;<br><a href="#">24758163</a> ; <a href="#">36028821</a> ; <a href="#">33193699</a> ;<br><a href="#">26291246</a> ; <a href="#">24889965</a> ; <a href="#">30280037</a> ;<br><a href="#">28202690</a> ; <a href="#">28264936</a> ; <a href="#">26892688</a> ;<br><a href="#">26597576</a> ; <a href="#">30678426</a> ; <a href="#">24950402</a> ;<br><a href="#">28147343</a> ; <a href="#">30650663</a> ; <a href="#">29530001</a> ;<br><a href="#">25864709</a> ; <a href="#">29530001</a> ; <a href="#">29530001</a> ;<br><a href="#">29530001</a> ; <a href="#">32640226</a> ; <a href="#">26892688</a> ;<br><a href="#">29530001</a> ; <a href="#">27233751</a> ; <a href="#">30061686</a> ;<br><a href="#">28923911</a> ; <a href="#">27741504</a> ; <a href="#">29340066</a> ;<br><a href="#">26293675</a> ; <a href="#">31746421</a> ; <a href="#">30246154</a> ;<br><a href="#">26091520</a> ; <a href="#">20420945</a> ; <a href="#">27270322</a> |
| DNA repair                           | CETN2; DDB1; RAD23A;<br>UBA52; USP7                                                                                                                                                                                                                                                                                                                                                                                                                | B; B; B;<br>B; 2                                                                                                                                                                                                    | <a href="#">30375513</a> ; <a href="#">29594129</a> ; <a href="#">29633253</a> ;<br><a href="#">27270322</a> ; <a href="#">32850836</a>                                                                                                                                                                                                                                                                                                                                                                                                                                                                                                                                                                                                                                                                                                                                                                                                                                                                                                                                                                                                                                                                                                                                                                                                                                                                                                                                                                                                                           |
| DNA replication                      | PSMA3; PSMA6; PSMB7;<br>PSMD10; PSMD3; PSMD6;<br>PSMD8; UBA52                                                                                                                                                                                                                                                                                                                                                                                      | B; B; B;<br>2; B; 2;<br>2; B                                                                                                                                                                                        | <a href="#">29304754</a> ; <a href="#">31086659</a> ; <a href="#">24758163</a> ;<br><a href="#">36028821</a> ; <a href="#">33193699</a> ; <a href="#">26291246</a> ;<br><a href="#">24889965</a> ; <a href="#">27270322</a>                                                                                                                                                                                                                                                                                                                                                                                                                                                                                                                                                                                                                                                                                                                                                                                                                                                                                                                                                                                                                                                                                                                                                                                                                                                                                                                                       |
| Extracellular matrix<br>organisation | CAST; CEACAM1; COL21A1;<br>COL5A3; EMILIN2; ITGB2;<br>LAMA3; NCSTN; SDC1;<br>SDC2; ZNF207                                                                                                                                                                                                                                                                                                                                                          | B; B; 2;<br>2; B; B;<br>2; 1; 1;<br>B; 2                                                                                                                                                                            | <a href="#">11895905</a> ; <a href="#">24931667</a> ; <a href="#">27390605</a> ;<br><a href="#">27597234</a> ; <a href="#">30544909</a> ; <a href="#">32226771</a> ;<br><a href="#">32555663</a> ; <a href="#">25887147</a> ; <a href="#">29340066</a> ;<br><a href="#">26293675</a> ; <a href="#">33563334</a>                                                                                                                                                                                                                                                                                                                                                                                                                                                                                                                                                                                                                                                                                                                                                                                                                                                                                                                                                                                                                                                                                                                                                                                                                                                   |
| Gene expression<br>(transcription)   | APOC1; CAST; CNOT2;<br>CNOT3; COX5B; DDX21;<br>DNAJB11; G6PD; KDM5B;<br>NDRG1; NUP205; PABPN1;<br>PBDC1; PIP4K2A; PRKRA;<br>PSMA3; PSMA6; PSMB7;<br>PSMD10; PSMD3; PSMD6;<br>PSMD8; RBM14; SRSF6;<br>TAOK2; TP53I3; TXNRD1;<br>UBA52; USP7; USP9X                                                                                                                                                                                                  | 1; B; 2;<br>2; B; 2;<br>B; B; 2;<br>B; 2; 2;<br>1; 1; B;<br>B; B; B;<br>2; B; 2;<br>2; B; B;<br>2; 2; 1;<br>B; 2; 2                                                                                                 | <a href="#">30732558</a> ; <a href="#">11895905</a> ; <a href="#">30108113</a> ;<br><a href="#">30650663</a> ; <a href="#">26869356</a> ; <a href="#">33328538</a> ;<br><a href="#">21423607</a> ; <a href="#">27861141</a> ; <a href="#">27480251</a> ;<br><a href="#">29898756</a> ; <a href="#">32467671</a> ; <a href="#">30787966</a> ;<br><a href="#">25428507</a> ; <a href="#">28637795</a> ; <a href="#">33406242</a> ;<br><a href="#">29304754</a> ; <a href="#">31086659</a> ; <a href="#">24758163</a> ;<br><a href="#">36028821</a> ; <a href="#">33193699</a> ; <a href="#">26291246</a> ;<br><a href="#">24889965</a> ; <a href="#">28786813</a> ; <a href="#">32901876</a> ;<br><a href="#">31088413</a> ; <a href="#">31223287</a> ; <a href="#">20420945</a> ;<br><a href="#">27270322</a> ; <a href="#">32850836</a> ; <a href="#">28103826</a>                                                                                                                                                                                                                                                                                                                                                                                                                                                                                                                                                                                                                                                                                                |
| Haemostasis                          | ATP1B3; ATP2B1; CD58;<br>CEACAM1; CYB5R1; EMILIN2;<br>FLNB; GYPA; ITGB2;<br>LAMP2; MAGED2; MMRN1;<br>OLA1; PYCR1; RHOG;<br>SDC1; SDC2; TMSB4X                                                                                                                                                                                                                                                                                                      | 1; B; 2;<br>B; 2; B;<br>B; 1; B;<br>B; 2; 2;<br>2; 2; 2;<br>1; B; 2                                                                                                                                                 | <a href="#">24236063</a> ; <a href="#">29285225</a> ; <a href="#">22403726</a> ;<br><a href="#">24931667</a> ; <a href="#">27120783</a> ; <a href="#">30544909</a> ;<br><a href="#">30764547</a> ; <a href="#">26716904</a> ; <a href="#">32226771</a> ;<br><a href="#">27627761</a> ; <a href="#">32547595</a> ; <a href="#">23536776</a> ;<br><a href="#">26863455</a> ; <a href="#">29805774</a> ; <a href="#">28202690</a> ;<br><a href="#">29340066</a> ; <a href="#">26293675</a> ; <a href="#">31781249</a>                                                                                                                                                                                                                                                                                                                                                                                                                                                                                                                                                                                                                                                                                                                                                                                                                                                                                                                                                                                                                                                |
| Immune system                        | ACTR1B; AGL; AP1G1;<br>APEH; ASAH1; ATP6V1A;<br>BPIFA1; BST2; C4BPB;                                                                                                                                                                                                                                                                                                                                                                               | 1; B; B;<br>B; 1; B;<br>1; 2; 1;                                                                                                                                                                                    | <a href="#">27039259</a> ; <a href="#">33224887</a> ; <a href="#">31002129</a> ;<br><a href="#">31086659</a> ; <a href="#">31049165</a> ; <a href="#">28592880</a> ;<br><a href="#">33506022</a> ; <a href="#">25860442</a> ; <a href="#">30453999</a> ;                                                                                                                                                                                                                                                                                                                                                                                                                                                                                                                                                                                                                                                                                                                                                                                                                                                                                                                                                                                                                                                                                                                                                                                                                                                                                                          |

|                       |                                                                                                                                                                                                                                                                                                                                                                                                                                                                                                                                                                                                                                                                                                                                                                                    |                                                                                                                                                                                                                                                                                                                                                                                             |                                                                                                                                                                                                                                                                                                                                                                                                                                                                                                                                                                                                                                                                                                                                                                                                                                                                                                                                                                                                                                                                                                                                                                                                                                                                                                                                                                                                                                                                                                                                                                                                                                                                                                                                                                                                                                                                                                                                                                                                                                                                                                                                                                                                                                                                                                                                                                                                                                                                                                                                                                                                                                                                                                                                                                                          |
|-----------------------|------------------------------------------------------------------------------------------------------------------------------------------------------------------------------------------------------------------------------------------------------------------------------------------------------------------------------------------------------------------------------------------------------------------------------------------------------------------------------------------------------------------------------------------------------------------------------------------------------------------------------------------------------------------------------------------------------------------------------------------------------------------------------------|---------------------------------------------------------------------------------------------------------------------------------------------------------------------------------------------------------------------------------------------------------------------------------------------------------------------------------------------------------------------------------------------|------------------------------------------------------------------------------------------------------------------------------------------------------------------------------------------------------------------------------------------------------------------------------------------------------------------------------------------------------------------------------------------------------------------------------------------------------------------------------------------------------------------------------------------------------------------------------------------------------------------------------------------------------------------------------------------------------------------------------------------------------------------------------------------------------------------------------------------------------------------------------------------------------------------------------------------------------------------------------------------------------------------------------------------------------------------------------------------------------------------------------------------------------------------------------------------------------------------------------------------------------------------------------------------------------------------------------------------------------------------------------------------------------------------------------------------------------------------------------------------------------------------------------------------------------------------------------------------------------------------------------------------------------------------------------------------------------------------------------------------------------------------------------------------------------------------------------------------------------------------------------------------------------------------------------------------------------------------------------------------------------------------------------------------------------------------------------------------------------------------------------------------------------------------------------------------------------------------------------------------------------------------------------------------------------------------------------------------------------------------------------------------------------------------------------------------------------------------------------------------------------------------------------------------------------------------------------------------------------------------------------------------------------------------------------------------------------------------------------------------------------------------------------------------|
|                       | CAMP; CD58; CDA;<br>CEACAM1; CYFIP1; DCTN1;<br>DNAJC13; DPP7; DYNC1I2;<br>EIF4G1; ENPP4; FASN;<br>FLNB; GAA; HRNR;<br>IFI16; IQGAP2; ITGB2;<br>LAMP2; LGALS9; LRRFIP1;<br>MLEC; NCSTN; NUP205;<br>PDAP1; PLA2G6; PPP3R1;<br>PSMA3; PSMA6; PSMB7;<br>PSMD10; PSMD3; PSMD6;<br>PSMD8; PTPRJ; RAB3D;<br>RBBP6; RHOG; SDC1;<br>SEC23B; SPTBN2; STX3;<br>TCN1; TCOF1; TXLNA;<br>UBA52; USP7; VAMP8                                                                                                                                                                                                                                                                                                                                                                                      | 1; 2; 2;<br>B; B; B;<br>2; B; B;<br>B; B; 2;<br>B; B; 1;<br>2; B; B;<br>B; 1; B;<br>2; 1; 2;<br>B; 2; B;<br>B; B; B;<br>2; B; 2;<br>2; 1; 1;<br>2; 2; 1;<br>B; 2; 1;<br>1; 2; 2;<br>B; 2; B                                                                                                                                                                                                 | <a href="#">27832772</a> ; <a href="#">22403726</a> ; <a href="#">28977491</a> ;<br><a href="#">24931667</a> ; <a href="#">29572294</a> ; <a href="#">33198314</a> ;<br><a href="#">33338880</a> ; <a href="#">21653254</a> ; <a href="#">31516392</a> ;<br><a href="#">18427574</a> ; <a href="#">27259239</a> ; <a href="#">25947066</a> ;<br><a href="#">30764547</a> ; <a href="#">8660303</a> ; <a href="#">25614008</a> ;<br><a href="#">28415616</a> ; <a href="#">28792442</a> ; <a href="#">32290321</a> ;<br><a href="#">27627761</a> ; <a href="#">29389859</a> ; <a href="#">26224133</a> ;<br><a href="#">28265552</a> ; <a href="#">25887147</a> ; <a href="#">32467671</a> ;<br><a href="#">24124450</a> ; <a href="#">28956850</a> ; <a href="#">24260486</a> ;<br><a href="#">29304754</a> ; <a href="#">31086659</a> ; <a href="#">24758163</a> ;<br><a href="#">36028821</a> ; <a href="#">33193699</a> ; <a href="#">26291246</a> ;<br><a href="#">24889965</a> ; <a href="#">32201537</a> ; <a href="#">22259059</a> ;<br><a href="#">23799110</a> ; <a href="#">28202690</a> ; <a href="#">29340066</a> ;<br><a href="#">32123160</a> ; <a href="#">31049165</a> ; <a href="#">27259239</a> ;<br><a href="#">32686693</a> ; <a href="#">28923911</a> ; <a href="#">33075095</a> ;<br><a href="#">27270322</a> ; <a href="#">32850836</a> ; <a href="#">30555541</a>                                                                                                                                                                                                                                                                                                                                                                                                                                                                                                                                                                                                                                                                                                                                                                                                                                                                                                                                                                                                                                                                                                                                                                                                                                                                                                                                                                                                |
| Metabolism            | ACADM; ADRM1; AGL;<br>AGPS; AK2; ALDH4A1;<br>ASXL3; ATP5F1; BDH2;<br>BPNT1; CDA; COX5B;<br>CPT2; DARS; DHRS7B;<br>DYNC1I2; ENPP1; EPB41L3;<br>FARSB; FASN; FHL2;<br>FLNB; G6PD; GAA;<br>GALE; GCAT; GDA;<br>GGT1; GLTP; GPX4;<br>HSD17B4; IARS; LARS;<br>LDHC; LHPP; LYPLA1;<br>MAK16; MARS; MT-ATP8;<br>NDUFA10; NDUFAB1; NDUFV2;<br>NEXN; NNT; NUP205;<br>OSBP; PBDC1; PCCB;<br>PIP4K2A; PITPNB; PLA2G6;<br>PMPCB; PNPLA6; PSMA3;<br>PSMA6; PSMB7; PSMD10;<br>PSMD3; PSMD6; PSMD8;<br>PTPLAD1; PYCR1; RPL14;<br>RPL15; RPL17; RPL18A;<br>RPL19; RPL23A; RPL24;<br>RPL3; RPL32; RPL34;<br>RPL35; RPL35A; RPL36;<br>RPS11; RPS13; RPS21;<br>RPS23; RPS27; RPS28;<br>SCP2; SDC1; SDC2;<br>SGPL1; SGSH; SQRDL;<br>SUMF2; TCN1; THRAP3;<br>TXNRD1; UBA52; UGP2;<br>UQCRH; USP7; USP9X | 1; 2; 2;<br>B; B; 2;<br>2; B; 2;<br>1; 2; B;<br>B; B; 2;<br>B; 2; 2;<br>1; 2; 2;<br>B; B; B;<br>B; 2; 1;<br>1; B; 2;<br>B; 2; 1;<br>2; B; B;<br>2; B; B;<br>1; B; 1;<br>2; B; 2;<br>2; 1; B;<br>1; 2; 2;<br>2; 2; B;<br>B; B; 2;<br>B; 2; 2;<br>B; 2; 1;<br>1; B; B;<br>B; B; B;<br>B; B; 1;<br>1; B; B;<br>B; B; B;<br>B; B; B;<br>B; 1; B;<br>2; 2; 2;<br>B; 1; 2;<br>1; B; B;<br>B; 2; 2 | <a href="#">29304754</a> ; <a href="#">23377018</a> ; <a href="#">33224887</a> ;<br><a href="#">26322624</a> ; <a href="#">30588094</a> ; <a href="#">32894095</a> ;<br><a href="#">25484917</a> ; <a href="#">26735889</a> ; <a href="#">31819198</a> ;<br><a href="#">33161837</a> ; <a href="#">28977491</a> ; <a href="#">26869356</a> ;<br><a href="#">31769430</a> ; <a href="#">26421711</a> ; <a href="#">30979825</a> ;<br><a href="#">31516392</a> ; <a href="#">30755817</a> ; <a href="#">20651987</a> ;<br><a href="#">26421711</a> ; <a href="#">25947066</a> ; <a href="#">27415427</a> ;<br><a href="#">30764547</a> ; <a href="#">27861141</a> ; <a href="#">8660303</a> ;<br><a href="#">31272438</a> ; <a href="#">26627478</a> ; <a href="#">31704733</a> ;<br><a href="#">27381639</a> ; <a href="#">30271202</a> ; <a href="#">31527591</a> ;<br><a href="#">32678070</a> ; <a href="#">31887549</a> ; <a href="#">26421711</a> ;<br><a href="#">31932876</a> ; <a href="#">26627478</a> ; <a href="#">33413672</a> ;<br><a href="#">32828126</a> ; <a href="#">16569247</a> ; <a href="#">28814324</a> ;<br><a href="#">26869356</a> ; <a href="#">33415077</a> ; <a href="#">24758163</a> ;<br><a href="#">29721183</a> ; <a href="#">26454069</a> ; <a href="#">32467671</a> ;<br><a href="#">25729885</a> ; <a href="#">25428507</a> ; <a href="#">26627478</a> ;<br><a href="#">28637795</a> ; <a href="#">20515954</a> ; <a href="#">28956850</a> ;<br><a href="#">21622897</a> ; <a href="#">26627478</a> ; <a href="#">29304754</a> ;<br><a href="#">31086659</a> ; <a href="#">24758163</a> ; <a href="#">36028821</a> ;<br><a href="#">33193699</a> ; <a href="#">26291246</a> ; <a href="#">24889965</a> ;<br><a href="#">26431493</a> ; <a href="#">29805774</a> ; <a href="#">28264936</a> ;<br><a href="#">26892688</a> ; <a href="#">26597576</a> ; <a href="#">30678426</a> ;<br><a href="#">24950402</a> ; <a href="#">28147343</a> ; <a href="#">30650663</a> ;<br><a href="#">29530001</a> ; <a href="#">25864709</a> ; <a href="#">29530001</a> ;<br><a href="#">29530001</a> ; <a href="#">29530001</a> ; <a href="#">29530001</a> ;<br><a href="#">32395510</a> ; <a href="#">29530001</a> ; <a href="#">27233751</a> ;<br><a href="#">30061686</a> ; <a href="#">28923911</a> ; <a href="#">31350888</a> ;<br><a href="#">31519191</a> ; <a href="#">29340066</a> ; <a href="#">26293675</a> ;<br><a href="#">31049165</a> ; <a href="#">31746421</a> ; <a href="#">19657234</a> ;<br><a href="#">3229626</a> ; <a href="#">32686693</a> ; <a href="#">29112714</a> ;<br><a href="#">31814764</a> ; <a href="#">27270322</a> ; <a href="#">26379393</a> ;<br><a href="#">31497032</a> ; <a href="#">32850836</a> ; <a href="#">28103826</a> |
| Metabolism of protein | ADRM1; ARCN1; C19orf10;<br>CETN2; CPM; DNAJB11;<br>DYNC1I2; EIF2S2; EIF2S3;                                                                                                                                                                                                                                                                                                                                                                                                                                                                                                                                                                                                                                                                                                        | 2; 1; B;<br>B; 1; B;<br>B; B; B;                                                                                                                                                                                                                                                                                                                                                            | <a href="#">23377018</a> ; <a href="#">22585861</a> ; <a href="#">22098948</a> ;<br><a href="#">30375513</a> ; <a href="#">28186967</a> ; <a href="#">21423607</a> ;<br><a href="#">31516392</a> ; <a href="#">17989776</a> ; <a href="#">29320577</a> ;                                                                                                                                                                                                                                                                                                                                                                                                                                                                                                                                                                                                                                                                                                                                                                                                                                                                                                                                                                                                                                                                                                                                                                                                                                                                                                                                                                                                                                                                                                                                                                                                                                                                                                                                                                                                                                                                                                                                                                                                                                                                                                                                                                                                                                                                                                                                                                                                                                                                                                                                 |

|                                      |                                                                                                                                                                                                                                                                                                                                                                                                                                 |                                                                                                                                                                                                         |                                                                                                                                                                                                                                                                                                                                                                                                                                                                                                                                                                                                                                                                                                                                                                                                                                                                                                                                                                                                                                                                                                                                                                                                                                                                                                                                                                                                                                                                                |
|--------------------------------------|---------------------------------------------------------------------------------------------------------------------------------------------------------------------------------------------------------------------------------------------------------------------------------------------------------------------------------------------------------------------------------------------------------------------------------|---------------------------------------------------------------------------------------------------------------------------------------------------------------------------------------------------------|--------------------------------------------------------------------------------------------------------------------------------------------------------------------------------------------------------------------------------------------------------------------------------------------------------------------------------------------------------------------------------------------------------------------------------------------------------------------------------------------------------------------------------------------------------------------------------------------------------------------------------------------------------------------------------------------------------------------------------------------------------------------------------------------------------------------------------------------------------------------------------------------------------------------------------------------------------------------------------------------------------------------------------------------------------------------------------------------------------------------------------------------------------------------------------------------------------------------------------------------------------------------------------------------------------------------------------------------------------------------------------------------------------------------------------------------------------------------------------|
|                                      | EIF3A; EIF3C; EIF3L;<br>EIF4B; EIF4G1; FARSB;<br>GMD5; GOLGB1; IARS;<br>KDELRL1; MARS; NUP205;<br>PDIA5; PFDN1; PFDN2;<br>PMPCB; PSMD3; PSMD6;<br>PSMD8; RPL14; RPL15;<br>RPS11; RPS13; RPS21;<br>RPS23; RPS27; RPS28;<br>SDC2; SPCS2; SPTBN2;<br>SRP72; SRPRB; TARS;<br>TBCA; TBCD; TMED3;<br>UBA52; USO1                                                                                                                      | B; B; B;<br>B; B; 1;<br>B; 2; 2;<br>1; B; 2;<br>2; 1; B;<br>2; B; 2;<br>2; 1; 1;<br>B; B; B;<br>B; B; B;<br>B; 1; 2;<br>1; 2; 2;<br>B; 2; 2;<br>B; B                                                    | <a href="#">29581788</a> ; <a href="#">33000238</a> ; <a href="#">33550985</a> ;<br><a href="#">25611378</a> ; <a href="#">18427574</a> ; <a href="#">26421711</a> ;<br><a href="#">31337362</a> ; <a href="#">20685852</a> ; <a href="#">31887549</a> ;<br><a href="#">30678426</a> ; <a href="#">16569247</a> ; <a href="#">32467671</a> ;<br><a href="#">26627478</a> ; <a href="#">32670816</a> ; <a href="#">32670816</a> ;<br><a href="#">21622897</a> ; <a href="#">33193699</a> ; <a href="#">26291246</a> ;<br><a href="#">24889965</a> ; <a href="#">28264936</a> ; <a href="#">26892688</a> ;<br><a href="#">32395510</a> ; <a href="#">29530001</a> ; <a href="#">27233751</a> ;<br><a href="#">30061686</a> ; <a href="#">28923911</a> ; <a href="#">31350888</a> ;<br><a href="#">26293675</a> ; <a href="#">27648361</a> ; <a href="#">28793054</a> ;<br><a href="#">27913494</a> ; <a href="#">26421711</a> ; <a href="#">33266490</a> ;<br><a href="#">21622897</a> ; <a href="#">32670816</a> ; <a href="#">29085821</a> ;<br><a href="#">27270322</a> ; <a href="#">28969018</a>                                                                                                                                                                                                                                                                                                                                                                            |
| Metabolism of RNA                    | CNOT2; CNOT3; DDX21;<br>DKC1; EIF4B; EIF4G1;<br>FUS; GEMIN5; GNL3;<br>HNRNPUL1; MT-ATP8; NHP2;<br>NUP205; PABPN1; PRPF40A;<br>PRPF6; PSMA3; PSMA6;<br>PSMB7; PSMD10; PSMD3;<br>PSMD6; PSMD8; PUF60;<br>RPL14; RPL15; RPL17;<br>RPL18A; RPL19; RPL23A;<br>RPL24; RPL3; RPL32;<br>RPL34; RPL35; RPL35A;<br>RPL36; RPS11; RPS13;<br>RPS21; RPS23; RPS27;<br>RPS28; SF3A1; SF3B2;<br>SF3B4; SNRNP70; SRRM2;<br>SRSF10; SRSF6; UBA52 | 2; 2; 2;<br>2; B; B;<br>B; 2; 2;<br>B; B; 2;<br>2; 2; B;<br>2; B; B;<br>B; 2; B;<br>2; 2; 2;<br>1; 1; B;<br>B; B; B;<br>B; B; B;<br>1; 1; B;<br>B; B; B;<br>B; B; B;<br>1; 2; 2;<br>B; B; 2;<br>1; B; B | <a href="#">30108113</a> ; <a href="#">30650663</a> ; <a href="#">33328538</a> ;<br><a href="#">31857720</a> ; <a href="#">25611378</a> ; <a href="#">18427574</a> ;<br><a href="#">33000238</a> ; <a href="#">28786813</a> ; <a href="#">28849076</a> ;<br><a href="#">32106407</a> ; <a href="#">28814324</a> ; <a href="#">28289249</a> ;<br><a href="#">32467671</a> ; <a href="#">30787966</a> ; <a href="#">28786813</a> ;<br><a href="#">32745318</a> ; <a href="#">29304754</a> ; <a href="#">31086659</a> ;<br><a href="#">24758163</a> ; <a href="#">36028821</a> ; <a href="#">33193699</a> ;<br><a href="#">26291246</a> ; <a href="#">24889965</a> ; <a href="#">33194730</a> ;<br><a href="#">28264936</a> ; <a href="#">26892688</a> ; <a href="#">26597576</a> ;<br><a href="#">30678426</a> ; <a href="#">24950402</a> ; <a href="#">28147343</a> ;<br><a href="#">30650663</a> ; <a href="#">30105457</a> ; <a href="#">25864709</a> ;<br><a href="#">29530001</a> ; <a href="#">29530001</a> ; <a href="#">29530001</a> ;<br><a href="#">29530001</a> ; <a href="#">32395510</a> ; <a href="#">29530001</a> ;<br><a href="#">27233751</a> ; <a href="#">30061686</a> ; <a href="#">28923911</a> ;<br><a href="#">31350888</a> ; <a href="#">26079486</a> ; <a href="#">31348270</a> ;<br><a href="#">33563334</a> ; <a href="#">31788113</a> ; <a href="#">27530828</a> ;<br><a href="#">29429992</a> ; <a href="#">32901876</a> ; <a href="#">27270322</a> |
| Muscle contraction                   | ATP1B3; ATP2B1; MYL12B                                                                                                                                                                                                                                                                                                                                                                                                          | 1; B; B                                                                                                                                                                                                 | <a href="#">24236063</a> ; <a href="#">29285225</a> ; <a href="#">25029196</a>                                                                                                                                                                                                                                                                                                                                                                                                                                                                                                                                                                                                                                                                                                                                                                                                                                                                                                                                                                                                                                                                                                                                                                                                                                                                                                                                                                                                 |
| Neuronal system                      | DCTN1; EPB41L3; FLNB                                                                                                                                                                                                                                                                                                                                                                                                            | B; 2; B                                                                                                                                                                                                 | <a href="#">33198314</a> ; <a href="#">20651987</a> ; <a href="#">29682400</a>                                                                                                                                                                                                                                                                                                                                                                                                                                                                                                                                                                                                                                                                                                                                                                                                                                                                                                                                                                                                                                                                                                                                                                                                                                                                                                                                                                                                 |
| Organelle biogenesis and maintenance | ATP5F1; CETN2; DCTN1;<br>DYNC1I2; HAUS4; MT-ATP8;<br>PAFAH1B1; PCNT; USP9X;<br>VWA8                                                                                                                                                                                                                                                                                                                                             | B; B; B;<br>B; 2; B;<br>B; 2; 2;<br>2                                                                                                                                                                   | <a href="#">26735889</a> ; <a href="#">30375513</a> ; <a href="#">33198314</a> ;<br><a href="#">31516392</a> ; <a href="#">26121572</a> ; <a href="#">28814324</a> ;<br><a href="#">31925297</a> ; <a href="#">28426876</a> ; <a href="#">28103826</a> ;<br><a href="#">30546434</a>                                                                                                                                                                                                                                                                                                                                                                                                                                                                                                                                                                                                                                                                                                                                                                                                                                                                                                                                                                                                                                                                                                                                                                                           |
| Programmed cell death                | ACIN1; PPP3R1; PSMA3;<br>PSMA6; PSMB7; PSMD3;<br>PSMD6; PSMD8; PSMD10;<br>UBA52                                                                                                                                                                                                                                                                                                                                                 | 2; B; B;<br>B; B; B;<br>2; 2; 2;<br>B                                                                                                                                                                   | <a href="#">24493827</a> ; <a href="#">24260486</a> ; <a href="#">29304754</a> ;<br><a href="#">31086659</a> ; <a href="#">24758163</a> ; <a href="#">33193699</a> ;<br><a href="#">26291246</a> ; <a href="#">24889965</a> ; <a href="#">36028821</a> ;<br><a href="#">27270322</a>                                                                                                                                                                                                                                                                                                                                                                                                                                                                                                                                                                                                                                                                                                                                                                                                                                                                                                                                                                                                                                                                                                                                                                                           |
| Protein localisation                 | ABCD3; AGPS; CHCHD2;<br>COA6; HSD17B4; PEX19;<br>PITRM1; PMPCB; PREP;<br>SCP2; SLC25A4; UBA52;<br>USP9X                                                                                                                                                                                                                                                                                                                         | 1; B; 2;<br>B; B; B;<br>2; 2; 1;<br>B; B; B;<br>2                                                                                                                                                       | <a href="#">25004396</a> ; <a href="#">26322624</a> ; <a href="#">31036064</a> ;<br><a href="#">33415077</a> ; <a href="#">32678070</a> ; <a href="#">29746593</a> ;<br><a href="#">25886033</a> ; <a href="#">21622897</a> ; <a href="#">29651130</a> ;<br><a href="#">31519191</a> ; <a href="#">26091520</a> ; <a href="#">27270322</a> ;<br><a href="#">28103826</a>                                                                                                                                                                                                                                                                                                                                                                                                                                                                                                                                                                                                                                                                                                                                                                                                                                                                                                                                                                                                                                                                                                       |
| Reproduction                         | SCP2                                                                                                                                                                                                                                                                                                                                                                                                                            | B                                                                                                                                                                                                       | <a href="#">31519191</a>                                                                                                                                                                                                                                                                                                                                                                                                                                                                                                                                                                                                                                                                                                                                                                                                                                                                                                                                                                                                                                                                                                                                                                                                                                                                                                                                                                                                                                                       |
| Signal transduction                  | ABCC6; APOC1; ATP6V1A;<br>COL5A3; CYFIP1; DYNC1I2;<br>ECE1; EIF4B; EIF4G1;<br>FASN; FLNB; FUS;<br>G3BP2; IQGAP2; KHDRBS1;                                                                                                                                                                                                                                                                                                       | 2; 1; B;<br>2; B; B;<br>1; B; B;<br>2; B; B;<br>B; B; B;                                                                                                                                                | <a href="#">31565477</a> ; <a href="#">30732558</a> ; <a href="#">28592880</a> ;<br><a href="#">27597234</a> ; <a href="#">29572294</a> ; <a href="#">31516392</a> ;<br><a href="#">33575255</a> ; <a href="#">25611378</a> ; <a href="#">18427574</a> ;<br><a href="#">25947066</a> ; <a href="#">31665330</a> ; <a href="#">33000238</a> ;<br><a href="#">30586414</a> ; <a href="#">28792442</a> ; <a href="#">29023197</a> ;                                                                                                                                                                                                                                                                                                                                                                                                                                                                                                                                                                                                                                                                                                                                                                                                                                                                                                                                                                                                                                               |

|                                                                          |                              |          |                                                                                  |
|--------------------------------------------------------------------------|------------------------------|----------|----------------------------------------------------------------------------------|
|                                                                          | KIDINS220; LAMA3; LYPLA1;    | 2; 2; B; | <a href="#">31516392</a> ; <a href="#">32555663</a> ; <a href="#">33413672</a> ; |
|                                                                          | METAP2; MYL12B; NCSTN;       | B; B; 1; | <a href="#">28588753</a> ; <a href="#">25029196</a> ; <a href="#">25887147</a> ; |
|                                                                          | PAFAH1B1; PIP4K2A; PPP1R12A; | B; 1; 2; | <a href="#">31925297</a> ; <a href="#">28637795</a> ; <a href="#">26113782</a> ; |
|                                                                          | PPP1R12C; PPP3R1; PSMA3;     | 2; B; B; | <a href="#">30532555</a> ; <a href="#">24260486</a> ; <a href="#">29304754</a> ; |
|                                                                          | PSMA6; PSMB7; PSMD10;        | B; B; 2; | <a href="#">31086659</a> ; <a href="#">24758163</a> ; <a href="#">36028821</a> ; |
|                                                                          | PSMD3; PSMD6; PSMD8;         | B; 2; 2; | <a href="#">33193699</a> ; <a href="#">26291246</a> ; <a href="#">24889965</a> ; |
|                                                                          | PTPRJ; PTPRK; RCC2;          | 1; 2; 2; | <a href="#">32201537</a> ; <a href="#">28731148</a> ; <a href="#">28869598</a> ; |
|                                                                          | RGS10; RHOG; RPS27;          | 1; 2; B; | <a href="#">24475290</a> ; <a href="#">28202690</a> ; <a href="#">28923911</a> ; |
|                                                                          | SDC1; SDC2; SH3GL1;          | 1; B; B; | <a href="#">29340066</a> ; <a href="#">26293675</a> ; <a href="#">30246154</a> ; |
|                                                                          | SPTBN2; UBA52; USP7;         | 2; B; 2; | <a href="#">28793054</a> ; <a href="#">27270322</a> ; <a href="#">32850836</a> ; |
|                                                                          | USP9X                        | 2        | <a href="#">28103826</a>                                                         |
| Transport of small molecules                                             | ABCC6; ABCD3; ABCF1;         | 2; 1; 2; | <a href="#">31565477</a> ; <a href="#">25004396</a> ; <a href="#">26374197</a> ; |
|                                                                          | ADD3; APOC1; ATP1B3;         | 1; 1; 1; | <a href="#">31814885</a> ; <a href="#">30732558</a> ; <a href="#">24236063</a> ; |
|                                                                          | ATP2B1; ATP6V1A; CYB5R1;     | B; B; 2; | <a href="#">29285225</a> ; <a href="#">28592880</a> ; <a href="#">27120783</a> ; |
|                                                                          | EIF2S2; EIF2S3; EIF4B;       | B; B; B; | <a href="#">17989776</a> ; <a href="#">29320577</a> ; <a href="#">25611378</a> ; |
|                                                                          | FLNB; HDLBP; MYO5B;          | B; B; 2; | <a href="#">29682400</a> ; <a href="#">31213659</a> ; <a href="#">32670437</a> ; |
|                                                                          | OSTM1; PEX19; PMPCB;         | 2; B; 2; | <a href="#">28927463</a> ; <a href="#">29746593</a> ; <a href="#">21622897</a> ; |
|                                                                          | PNPLA6; PSMA3; PSMA6;        | 2; B; B; | <a href="#">26627478</a> ; <a href="#">29304754</a> ; <a href="#">31086659</a> ; |
|                                                                          | PSMB7; PSMD10; PSMD3;        | B; 2; B; | <a href="#">24758163</a> ; <a href="#">36028821</a> ; <a href="#">33193699</a> ; |
|                                                                          | PSMD6; PSMD8; RPL3;          | 2; 2; B; | <a href="#">26291246</a> ; <a href="#">24889965</a> ; <a href="#">29530001</a> ; |
|                                                                          | SLC12A2; SLC25A4; UBA52      | 1; B; B  | <a href="#">19294005</a> ; <a href="#">26091520</a> ; <a href="#">27270322</a>   |
| Vesicle mediated transport                                               | AP1G1; ARCN1; CHMP5;         | B; 1; B; | <a href="#">31002129</a> ; <a href="#">22585861</a> ; <a href="#">30678426</a> ; |
|                                                                          | CLINT1; CTAGE5; DCTN1;       | 1; 2; B; | <a href="#">22613733</a> ; <a href="#">26627478</a> ; <a href="#">33198314</a> ; |
|                                                                          | DNASE2; DYNC1I2; GOLGB1;     | 2; B; 2; | <a href="#">18593951</a> ; <a href="#">31516392</a> ; <a href="#">20685852</a> ; |
|                                                                          | KDELRL1; M6PR; MIA3;         | 1; B; 2; | <a href="#">30678426</a> ; <a href="#">26610586</a> ; <a href="#">31929798</a> ; |
|                                                                          | PAFAH1B1; PAFAH1B3; PLA2G6;  | B; B; 2; | <a href="#">31925297</a> ; <a href="#">29304754</a> ; <a href="#">28956850</a> ; |
|                                                                          | RAB6B; SH3GL1; SPECC1L;      | B; B; 2; | <a href="#">23442798</a> ; <a href="#">30246154</a> ; <a href="#">25204415</a> ; |
|                                                                          | SPTBN2; SSC5D; TCOF1;        | 2; 2; 2; | <a href="#">28793054</a> ; <a href="#">29854292</a> ; <a href="#">28923911</a> ; |
|                                                                          | TGOLN2; TMED3; TPD52L1;      | B; 2; B; | <a href="#">27259239</a> ; <a href="#">29085821</a> ; <a href="#">30678426</a> ; |
|                                                                          | UBA52; USO1; VAMP8           | B; B; B  | <a href="#">27270322</a> ; <a href="#">28969018</a> ; <a href="#">30555541</a>   |
| Found by GO pathway analysis but missing from Reactome® network analysis | PFKP; AEBP1; AKAP17A;        | B; 2; 2; | <a href="#">27049827</a> ; <a href="#">28562334</a> ; <a href="#">25394645</a> ; |
|                                                                          | ALPPL2; ANP32E; AP3D1;       | 1; B; 2; | <a href="#">31687420</a> ; <a href="#">32899298</a> ; <a href="#">25109897</a> ; |
|                                                                          | ARL6IP4; ARMCX3; BTF3L4;     | 2; 2; B; | <a href="#">25886033</a> ; <a href="#">29335024</a> ; <a href="#">27519173</a> ; |
|                                                                          | C11orf57; C1orf210; CASC4;   | 2; 1; 1; | <a href="#">19546167</a> ; <a href="#">32399279</a> ; <a href="#">27530828</a> ; |
|                                                                          | CCDC9; CEACAM8; CDV3;        | 2; B; 2; | <a href="#">25886033</a> ; <a href="#">29110374</a> ; <a href="#">26421711</a> ; |
|                                                                          | CEL2; CENPV; CISD1;          | 2; 2; B; | <a href="#">23795348</a> ; <a href="#">29130934</a> ; <a href="#">28095368</a> ; |
|                                                                          | COMMD8; CRELD1; CROCC;       | 1; 2; B; | <a href="#">30280037</a> ; <a href="#">26627478</a> ; <a href="#">33194730</a> ; |
|                                                                          | DDRKG1; DENR; DHX57;         | 2; B; 2; | <a href="#">30906477</a> ; <a href="#">30224410</a> ; <a href="#">29571074</a> ; |
|                                                                          | DMBT1; DNAJC10; EEF1D;       | B; 2; 2; | <a href="#">17525270</a> ; <a href="#">33338880</a> ; <a href="#">26735889</a> ; |
|                                                                          | EIF5B; ELMO3; EPS8L2;        | 2; 2; 2; | <a href="#">31817792</a> ; <a href="#">30236127</a> ; <a href="#">22783413</a> ; |
|                                                                          | ERGIC1; FAM114A1; FAM3D;     | 1; 1; 1; | <a href="#">17555561</a> ; <a href="#">31143935</a> ; <a href="#">30045992</a> ; |
|                                                                          | FAM98A; FLYWCH2; FNDC1;      | 2; 2; 2; | <a href="#">31049165</a> ; <a href="#">31423159</a> ; <a href="#">30402143</a> ; |
|                                                                          | FYCO1; G3BP1; GALNT7;        | 2; B; 1; | <a href="#">26208877</a> ; <a href="#">31560169</a> ; <a href="#">22399294</a> ; |
|                                                                          | GOLGA3; GOLM1; GORASP2;      | B; B; 1; | <a href="#">29745428</a> ; <a href="#">30556321</a> ; <a href="#">31086659</a> ; |
|                                                                          | GPATCH8; HHIPL2; HID1;       | 2; 2; 2; | <a href="#">29125844</a> ; <a href="#">33431054</a> ; <a href="#">27891540</a> ; |
|                                                                          | HMG3; HMG4; HMG5;            | 2; 2; 2; | <a href="#">27604143</a> ; <a href="#">19292913</a> ; <a href="#">26290438</a> ; |
|                                                                          | HSPE1; HTATSF1; IGHV-III;    | B; B; B; | <a href="#">17989776</a> ; <a href="#">27259239</a> ; <a href="#">20461121</a> ; |
|                                                                          | IKBIP; ITFG1; KIAA1217;      | B; 1; 2; | <a href="#">33509747</a> ; <a href="#">26627478</a> ; <a href="#">29698419</a> ; |
|                                                                          | LRPAP1; LUC7L2; LZIC;        | B; 2; B; | <a href="#">32939876</a> ; <a href="#">33550985</a> ; <a href="#">31432149</a> ; |
|                                                                          | MAP1A; MAP4; MARCKSL1;       | 2; 2; B; | <a href="#">22697792</a> ; <a href="#">32823874</a> ; <a href="#">32582275</a> ; |
|                                                                          | MGA1; MMRN2; MXRA7;          | 2; B; B; | <a href="#">8620511</a> ; <a href="#">32439908</a> ; <a href="#">27817035</a> ;  |

|                           |                 |                                                                                  |
|---------------------------|-----------------|----------------------------------------------------------------------------------|
| MYH4; NAP1L1; NAP1L5;     | <u>2; B; B;</u> | <a href="#">30670742</a> ; <a href="#">32290321</a> ; <a href="#">19439102</a> ; |
| NARS; NCLN; NOLC1;        | <u>1; 2; B;</u> | <a href="#">21134280</a> ; <a href="#">32139907</a> ; <a href="#">31941945</a> ; |
| NUCB1; OCIAD2; OGFR;      | <u>B; B; 2;</u> | <a href="#">30280037</a> ; <a href="#">28911005</a> ; <a href="#">28676692</a> ; |
| PABPC1L; PAGE4; PCNP;     | <u>1; 2; B;</u> | <a href="#">31607220</a> ; <a href="#">24708576</a> ; <a href="#">22022533</a> ; |
| PIN4; PLS1; POC1B-GALNT4; | <u>2; B; 1;</u> | <a href="#">23209772</a> ; <a href="#">23209772</a> ; <a href="#">28187432</a> ; |
| PPIG; PRPF4B; PRPSAP1;    | <u>2; 2; 2;</u> | <a href="#">27135912</a> ; <a href="#">32033228</a> ; <a href="#">23634293</a> ; |
| PRR14L; PRRC2C; PTMA;     | <u>2; 2; B;</u> | <a href="#">29221110</a> ; <a href="#">30116770</a> ; <a href="#">26517516</a> ; |
| RASD2; RBM25; RBM26;      | <u>2; 2; 2;</u> | <a href="#">31704733</a> ; <a href="#">29693319</a> ; <a href="#">25780673</a> ; |
| RCN2; RCSD1; RER1;        | <u>1; 2; 2;</u> | <a href="#">29218241</a> ; <a href="#">28814324</a> ; <a href="#">30108113</a> ; |
| RERE; RIMS2; RNPEP;       | <u>2; 2; B;</u> | <a href="#">25352341</a> ; <a href="#">30692208</a> ; <a href="#">25888189</a> ; |
| S100A13; S100A6; SAFB;    | <u>2; 2; B;</u> | <a href="#">30558666</a> ; <a href="#">19506550</a> ; <a href="#">19506550</a> ; |
| SDF4; SSR4; ST13P5;       | <u>1; 1; B;</u> | <a href="#">25733820</a> ; <a href="#">27648361</a> ; <a href="#">24817948</a> ; |
| TM9SF2; TM9SF3; TMA7;     | <u>B; 1; 2;</u> | <a href="#">25886033</a> ; <a href="#">25886033</a> ; <a href="#">28486536</a> ; |
| TOR1AIP2; TPBG; TPPP3;    | <u>2; B; B;</u> | <a href="#">27186291</a> ; <a href="#">27323861</a> ; <a href="#">33384952</a> ; |
| TWF2; TXNDC17; XPNPEP1;   | <u>B; 2; B;</u> | <a href="#">32860342</a> ; <a href="#">31814764</a> ; <a href="#">30894686</a> ; |
| ZC3H18; ZG16B; ZNF428     | <u>2; 1; 2</u>  | <a href="#">31945087</a> ; <a href="#">33336077</a> ; <a href="#">29721183</a>   |

\*The EC Type where protein expression is increased: Type 1 EC = 1, Type 2 EC = 2 and both types of EC = B.
