# Supplementary material for: Identification of Potentially Novel Molecular Targets of Endometrial Cancer Using a Non-Biased Proteomic Approach
Source: Cancers (Basel). 2023 Sep 21;15(18):4665. doi: 10.3390/cancers15184665 (PMC10527058; doi:10.3390/cancers15184665)
Supplement: Supplementary file 1 [file cancers-15-04665-s001.zip]

Archive with 4 entries (4 files):
- Supplemental Infromation file.pdf
- Supplemental Table S1.pdf
- Supplemental Table S2.pdf
- Supplemental Table S3.pdf
